# Supplementary material
Source: publisher site journal article supplement (https://www.spandidos-publications.com/6651/downloadSupplementary)
Supplement: Supplementary file 1 [file downloadSupplementary]

## Sheet: Sheet1
Table SII. Genes in the HNSCC GEO dataset.
logFC	AveExpr	t	P.Value	adj.P.Val	B
ANKRD20A5P	-0.574849	2.49793	-25.9159	5.14e-70	1.06e-65	148.632
LINC01697	-0.555503	2.33656	-24.1718	6.17e-65	6.34e-61	137.098
CYP4F29P	-0.340535	2.65096	-23.1635	6.33e-62	4.33e-58	130.253
ANKRD20A11P	-0.45041	3.15087	-22.8838	4.43e-61	2.27e-57	128.331
COL4A1	0.472461	3.31377	22.5756	3.82e-60	1.57e-56	126.202
PADI1	-0.462277	2.94225	-21.6092	3.53e-57	1.21e-53	119.453
MMP1	1.32185	3.24484	21.1966	6.73e-56	1.98e-52	116.537
FMO9P	-0.700467	2.29767	-20.8835	6.38e-55	1.64e-51	114.312
SLC8A1-AS1	-0.598492	2.24567	-20.8377	8.88e-55	2.03e-51	113.985
ATP6V0A4	-0.642622	2.51225	-20.4408	1.57e-53	3.22e-50	111.147
COL4A2	0.408723	3.27108	20.1344	1.45e-52	2.61e-49	108.943
COL1A1	0.389154	3.32881	20.1275	1.53e-52	2.61e-49	108.894
GREM1	0.83141	3.07664	19.8919	8.51e-52	1.34e-48	107.193
LINC02487	-0.711709	2.69272	-19.8289	1.35e-51	1.98e-48	106.736
EHD3	-0.230016	2.80214	-19.0114	5.5e-49	7.53e-46	100.786
LOC100506098	-0.614301	2.84327	-18.9683	7.56e-49	9.71e-46	100.471
KRT14	0.318127	3.77657	18.8777	1.48e-48	1.79e-45	99.8071
RFK	-0.238938	3.18766	-18.7571	3.61e-48	4.12e-45	98.9225
SCIN	-0.523142	2.59137	-18.6689	6.95e-48	7.51e-45	98.2744
COL6A3	0.349698	3.56412	18.5382	1.83e-47	1.88e-44	97.3131
ETNK2	-0.409212	2.73396	-18.4816	2.79e-47	2.73e-44	96.8966
CAB39L	-0.344716	2.77706	-18.2277	1.85e-46	1.73e-43	95.0241
NUCB2	-0.296202	3.06621	-18.1805	2.63e-46	2.35e-43	94.6751
SERPINH1	0.36355	3.29282	18.1577	3.12e-46	2.67e-43	94.5067
CTHRC1	0.577751	3.36023	18.1415	3.52e-46	2.89e-43	94.3869
CAPN5	-0.277242	2.67083	-17.8897	2.31e-45	1.83e-42	92.5229
RBM20	-0.55714	2.25527	-17.6089	1.89e-44	1.44e-41	90.4395
CEBPB	0.181871	3.60005	17.5215	3.65e-44	2.68e-41	89.7896
CPPED1	-0.219308	2.88346	-17.4243	7.57e-44	5.37e-41	89.0658
VIT	-0.370286	2.73432	-17.4082	8.54e-44	5.85e-41	88.9466
CDH3	0.381857	3.44462	17.3755	1.09e-43	7.13e-41	88.7031
SLC35C1	-0.182457	2.95558	-17.3734	1.11e-43	7.13e-41	88.6871
TCP11L2	-0.203265	2.39823	-17.3421	1.4e-43	8.74e-41	88.4539
TMEM184B	0.173073	3.09247	17.1574	5.63e-43	3.4e-40	87.0774
MAB21L4	-0.468229	2.68331	-17.0139	1.66e-42	9.75e-40	86.006
C15orf62	-0.339065	2.53322	-16.884	4.42e-42	2.53e-39	85.0352
COL5A2	0.462909	3.36778	16.8081	7.84e-42	4.36e-39	84.4679
SHROOM3	-0.288287	2.77873	-16.6967	1.82e-41	9.84e-39	83.634
FUT6	-0.375573	2.80842	-16.6818	2.04e-41	1.07e-38	83.5224
STN1	-0.211305	2.78207	-16.6519	2.55e-41	1.31e-38	83.2989
LINC00551	-0.292033	2.03777	-16.6028	3.7e-41	1.85e-38	82.9312
FLG-AS1	-0.249901	2.20998	-16.5846	4.24e-41	2.08e-38	82.7949
EMP1	-0.31515	3.16942	-16.5114	7.38e-41	3.53e-38	82.246
PLAU	0.509432	3.16246	16.447	1.2e-40	5.61e-38	81.7635
OR7E14P	-0.475631	2.39338	-16.4041	1.66e-40	7.59e-38	81.442
MYZAP	-0.460725	2.8846	-16.3945	1.79e-40	7.98e-38	81.3703
MINPP1	0.320012	2.78671	16.1805	9.03e-40	3.95e-37	79.7642
RMND5B	-0.163183	2.92252	-16.1447	1.18e-39	5.07e-37	79.4953
TRIP10	-0.220265	3.15608	-16.0715	2.06e-39	8.65e-37	78.946
SORBS2	-0.346096	2.53325	-16.034	2.74e-39	1.13e-36	78.6643
LUM	0.323694	3.34927	16.0098	3.29e-39	1.33e-36	78.4819
SLC6A4	-0.314816	2.23335	-15.9911	3.79e-39	1.5e-36	78.3417
FAP	0.575643	3.04214	15.9871	3.91e-39	1.51e-36	78.3115
UBL3	-0.192743	3.2649	-15.9849	3.98e-39	1.51e-36	78.2948
TPCN1	-0.113139	2.99417	-15.8972	7.73e-39	2.89e-36	77.636
SH3BGRL2	-0.528441	2.94059	-15.8795	8.84e-39	3.25e-36	77.5031
PPCDC	-0.21793	2.75244	-15.8053	1.55e-38	5.6e-36	76.9448
MMP12	0.867822	3.279	15.7446	2.46e-38	8.72e-36	76.489
LPIN1	-0.306795	2.90746	-15.7174	3.03e-38	1.05e-35	76.2842
BTC	-0.302226	2.14463	-15.7045	3.34e-38	1.14e-35	76.187
MPC1	-0.144588	2.83941	-15.702	3.4e-38	1.15e-35	76.168
LOC100130449	-0.349701	2.31396	-15.6594	4.7e-38	1.56e-35	75.8478
PAQR8	-0.280699	2.86781	-15.6337	5.71e-38	1.86e-35	75.6546
GPD1L	-0.367976	3.09517	-15.5409	1.16e-37	3.71e-35	74.9562
ADAMTS2	0.346575	2.86386	15.4857	1.76e-37	5.55e-35	74.5412
MYO1B	0.349317	3.07587	15.4555	2.21e-37	6.88e-35	74.3138
SLC37A1	-0.152007	2.59958	-15.4238	2.81e-37	8.62e-35	74.0749
PMM1	-0.199881	3.01784	-15.401	3.34e-37	1.01e-34	73.9037
HCG22	-0.377881	2.74107	-15.326	5.9e-37	1.76e-34	73.3391
COL16A1	0.254592	3.16948	15.3074	6.8e-37	2e-34	73.1989
RERGL	-0.329244	2.18814	-15.2301	1.22e-36	3.54e-34	72.6169
AFDN-DT	-0.277254	2.32567	-15.1935	1.62e-36	4.61e-34	72.3412
SYTL4	-0.208895	2.55197	-15.1834	1.74e-36	4.91e-34	72.2653
PKIB	-0.347308	2.50561	-15.1778	1.82e-36	5.03e-34	72.2236
SORT1	-0.250043	2.95994	-15.1767	1.84e-36	5.03e-34	72.2151
TJP3	-0.285639	2.72408	-15.1621	2.05e-36	5.54e-34	72.1052
EMC3	-0.115455	2.84391	-15.1437	2.36e-36	6.29e-34	71.9666
MTERF4	-0.113388	2.87804	-15.0771	3.91e-36	1.03e-33	71.4652
SAMD5	-0.383069	2.48063	-15.0711	4.09e-36	1.07e-33	71.4197
SNX31	-0.674071	2.47184	-15.0576	4.53e-36	1.16e-33	71.3185
AIF1L	-0.320666	2.92148	-15.0344	5.41e-36	1.37e-33	71.1438
PGAP3	-0.154838	2.94225	-15.0047	6.78e-36	1.7e-33	70.9199
GCHFR	-0.35876	2.95788	-14.966	9.1e-36	2.25e-33	70.6284
IFI6	0.538721	3.17855	14.9583	9.64e-36	2.36e-33	70.5708
COLGALT1	0.161209	3.0699	14.9175	1.31e-35	3.15e-33	70.2636
VSIG10	-0.219785	2.67811	-14.9172	1.32e-35	3.15e-33	70.2614
ATP2C1	0.17988	3.03994	14.8995	1.51e-35	3.56e-33	70.1277
LOC100507221	-0.379132	2.08722	-14.8945	1.57e-35	3.66e-33	70.0903
MTMR10	-0.129911	2.79648	-14.8491	2.21e-35	5.11e-33	69.748
ACOX1	-0.132932	2.80197	-14.832	2.52e-35	5.75e-33	69.6195
INSYN1	-0.175024	2.46886	-14.8163	2.84e-35	6.41e-33	69.5012
MFAP2	0.416663	3.17993	14.8116	2.94e-35	6.57e-33	69.4661
ESPL1	-0.233509	3.08464	-14.8082	3.02e-35	6.66e-33	69.4405
SLC16A1	0.434304	2.95606	14.7749	3.88e-35	8.49e-33	69.19
LOXL2	0.193149	2.6986	14.7726	3.95e-35	8.55e-33	69.1727
COL5A1	0.360525	3.12446	14.7556	4.5e-35	9.63e-33	69.0443
FSCN1	0.310148	3.18463	14.7506	4.67e-35	9.9e-33	69.007
TMEM120A	-0.153546	3.08524	-14.723	5.76e-35	1.21e-32	68.7988
F2RL2	0.371076	2.6274	14.72	5.89e-35	1.21e-32	68.7765
SYT8	-0.342546	2.67794	-14.72	5.9e-35	1.21e-32	68.776
HSBP1	-0.108885	3.46766	-14.716	6.08e-35	1.24e-32	68.746
LEXM	-0.351535	2.51199	-14.7087	6.42e-35	1.29e-32	68.6916
TTC9	-0.405515	2.80371	-14.672	8.49e-35	1.69e-32	68.4148
LOC101929340	-0.19827	2.17502	-14.6661	8.87e-35	1.75e-32	68.3708
CCN4	0.446196	2.68156	14.6525	9.84e-35	1.93e-32	68.2681
GREM2	-0.359618	2.32344	-14.6454	1.04e-34	2.01e-32	68.2148
FNDC3B	0.239411	2.99039	14.6426	1.06e-34	2.04e-32	68.1939
ITGAV	0.17864	3.5446	14.6311	1.16e-34	2.2e-32	68.107
BARX2	-0.223795	2.80406	-14.6223	1.24e-34	2.33e-32	68.0412
WDR66	0.39555	2.73399	14.6021	1.44e-34	2.7e-32	67.8889
HOXC6	0.588721	2.76169	14.5741	1.79e-34	3.31e-32	67.6778
HEBP2	-0.126297	3.17729	-14.5673	1.88e-34	3.45e-32	67.6266
PSCA	-0.537094	2.85252	-14.5611	1.97e-34	3.58e-32	67.5806
SMDT1	-0.112068	2.94749	-14.5224	2.64e-34	4.77e-32	67.2887
CPEB3	-0.155377	2.46885	-14.5066	2.98e-34	5.33e-32	67.17
COL1A2	0.31241	3.59352	14.4851	3.51e-34	6.22e-32	67.0082
TYMP	0.271373	3.00198	14.4802	3.64e-34	6.4e-32	66.9716
LOX	0.442299	2.79394	14.4787	3.68e-34	6.41e-32	66.9603
C18orf25	-0.187558	2.7797	-14.4758	3.77e-34	6.5e-32	66.9383
NT5C2	-0.115639	2.89925	-14.4692	3.96e-34	6.78e-32	66.8885
HLCS	-0.296857	2.70275	-14.4355	5.11e-34	8.69e-32	66.6349
COL7A1	0.265879	3.13309	14.4292	5.37e-34	9.04e-32	66.5874
PLEKHA6	-0.151787	2.41289	-14.4052	6.43e-34	1.07e-31	66.4075
SERPINE1	0.634959	2.99506	14.4003	6.68e-34	1.11e-31	66.3704
SMPD2	-0.199142	2.90645	-14.3895	7.25e-34	1.19e-31	66.2894
STRADB	-0.166067	3.0772	-14.3465	1e-33	1.64e-31	65.9654
ARHGEF10L	-0.189411	2.92904	-14.3104	1.32e-33	2.14e-31	65.6943
MFHAS1	0.223837	3.1574	14.297	1.46e-33	2.35e-31	65.5935
SLC13A4	-0.224046	2.79995	-14.2882	1.56e-33	2.49e-31	65.5269
ELOVL6	-0.319989	2.63363	-14.2592	1.95e-33	3.08e-31	65.3093
ZNF519	-0.223026	2.40721	-14.2532	2.04e-33	3.2e-31	65.2637
CLDN11	-0.212565	2.46448	-14.2503	2.08e-33	3.25e-31	65.2422
FNDC4	-0.154371	2.96162	-14.2346	2.35e-33	3.63e-31	65.1237
CLIC4	0.224267	3.19576	14.2226	2.57e-33	3.94e-31	65.0341
ZNF823	-0.289595	2.82465	-14.2117	2.79e-33	4.25e-31	64.9521
GALNT12	-0.502571	2.82654	-14.1947	3.18e-33	4.8e-31	64.8238
TRAM2	0.173792	2.94361	14.1642	4.01e-33	6.01e-31	64.5945
COL3A1	0.299527	3.38379	14.1618	4.08e-33	6.07e-31	64.5767
IKZF2	-0.257941	2.62941	-14.1565	4.25e-33	6.28e-31	64.5369
KIAA0232	-0.182903	2.89972	-14.1336	5.05e-33	7.42e-31	64.3645
PDE6A	-0.222138	2.43228	-14.1287	5.24e-33	7.64e-31	64.3282
CLYBL	-0.139249	2.41619	-14.101	6.47e-33	9.36e-31	64.1197
CAST	-0.122509	3.15059	-14.0892	7.07e-33	1.02e-30	64.0313
C12orf75	0.359071	3.15546	14.0833	7.4e-33	1.06e-30	63.9864
SFTA2	-0.452764	2.29719	-14.0648	8.51e-33	1.21e-30	63.8479
PLAUR	0.303834	3.02612	14.0621	8.69e-33	1.22e-30	63.8272
SLC4A4	-0.122146	2.25297	-14.0558	9.11e-33	1.27e-30	63.7803
NIBAN2	-0.17489	3.19259	-14.0282	1.12e-32	1.56e-30	63.5727
PXDN	0.382057	3.06526	14.0256	1.15e-32	1.58e-30	63.5535
MYOC	-0.29536	2.6811	-14.0212	1.19e-32	1.62e-30	63.5198
ETFDH	-0.248489	2.8913	-13.9816	1.6e-32	2.18e-30	63.2229
INHBA	0.589481	2.8992	13.9759	1.67e-32	2.26e-30	63.1802
PLA2G7	0.508226	2.87835	13.9712	1.73e-32	2.33e-30	63.1442
GGT6	-0.37739	2.86104	-13.9589	1.9e-32	2.54e-30	63.0519
FUT3	-0.412975	2.85579	-13.9559	1.94e-32	2.58e-30	63.0296
RAB31	0.193	3.44579	13.9304	2.36e-32	3.1e-30	62.8383
ACPP	-0.34124	2.68877	-13.9198	2.55e-32	3.34e-30	62.7588
FAM3D	-0.49662	3.05877	-13.9142	2.66e-32	3.47e-30	62.7169
AGFG2	-0.140779	2.59853	-13.906	2.84e-32	3.66e-30	62.6552
TNFAIP6	0.552354	2.97659	13.9051	2.86e-32	3.67e-30	62.6483
MYRIP	-0.177336	2.21865	-13.9019	2.92e-32	3.73e-30	62.6245
KLB	-0.196887	2.22056	-13.9008	2.95e-32	3.74e-30	62.6161
PPP1R3C	-0.389303	2.72375	-13.8989	2.99e-32	3.77e-30	62.6019
ENAH	0.247613	2.89407	13.8493	4.36e-32	5.46e-30	62.2291
PMEPA1	0.298497	2.94635	13.8041	6.14e-32	7.64e-30	61.8902
TPBG	0.204565	2.99128	13.7957	6.54e-32	8.09e-30	61.8271
PHC1	-0.18022	2.93612	-13.7493	9.29e-32	1.14e-29	61.4793
POSTN	0.524074	2.90272	13.7325	1.05e-31	1.29e-29	61.3532
MGST2	-0.180936	3.31469	-13.7286	1.09e-31	1.32e-29	61.3239
NDRG2	-0.262474	2.92229	-13.7223	1.14e-31	1.38e-29	61.2766
ISG15	0.424712	3.45695	13.7125	1.23e-31	1.47e-29	61.2033
CDKN2AIP	-0.221773	2.98386	-13.6824	1.54e-31	1.84e-29	60.9775
LOC101928844	-0.168784	2.72253	-13.682	1.55e-31	1.84e-29	60.9741
CDC25B	0.181454	3.29737	13.6609	1.81e-31	2.14e-29	60.8163
NOVA1	-0.171915	2.16992	-13.6063	2.74e-31	3.22e-29	60.4066
TMEM100	-0.427696	2.47943	-13.6054	2.76e-31	3.22e-29	60.4003
SNAI2	0.243937	3.42686	13.5904	3.09e-31	3.59e-29	60.2878
THY1	0.28806	3.13762	13.5876	3.16e-31	3.64e-29	60.267
VSIG2	-0.188978	2.65344	-13.5861	3.19e-31	3.66e-29	60.2558
LNX1	-0.299046	2.86799	-13.5848	3.22e-31	3.68e-29	60.2457
DLG2	-0.180295	2.26095	-13.5578	3.95e-31	4.49e-29	60.0438
LAMC2	0.563001	3.04525	13.5433	4.41e-31	4.98e-29	59.9347
C1orf216	0.189308	2.86172	13.5424	4.44e-31	4.99e-29	59.9285
TMSB10	0.0782366	3.85164	13.5368	4.64e-31	5.18e-29	59.886
KRT78	-0.644102	3.10063	-13.5333	4.76e-31	5.29e-29	59.8597
PANX1	0.260115	2.88671	13.5302	4.87e-31	5.38e-29	59.8367
CGNL1	-0.48633	2.9179	-13.5291	4.91e-31	5.4e-29	59.8288
ZNRF1	-0.119722	2.78807	-13.4928	6.46e-31	7.06e-29	59.5569
ASAP1	0.139043	3.08119	13.486	6.81e-31	7.4e-29	59.5055
PDPN	0.343626	2.84157	13.4821	7.01e-31	7.58e-29	59.4766
LAMB1	0.196752	3.03413	13.4701	7.67e-31	8.26e-29	59.3865
HOMER3	0.263616	2.88339	13.4658	7.92e-31	8.48e-29	59.3548
ZNF844	-0.152009	2.48145	-13.4619	8.16e-31	8.69e-29	59.3256
TRIOBP	-0.112501	3.07416	-13.4352	9.99e-31	1.06e-28	59.1255
MAGI1	-0.11668	2.5433	-13.4265	1.07e-30	1.12e-28	59.0606
TP53INP2	-0.286043	3.21985	-13.4152	1.16e-30	1.22e-28	58.9758
FIG4	-0.12581	3.11081	-13.4049	1.26e-30	1.31e-28	58.8986
GNA14	-0.160641	2.45415	-13.3916	1.39e-30	1.44e-28	58.7995
C1QTNF7	-0.264385	2.2853	-13.3664	1.68e-30	1.73e-28	58.6109
MIEF2	-0.150911	2.73362	-13.3628	1.73e-30	1.77e-28	58.5836
REEP6	-0.25389	2.71774	-13.3618	1.74e-30	1.78e-28	58.5763
CRYM	-0.294255	2.92181	-13.3585	1.78e-30	1.81e-28	58.5519
QARS	-0.111243	3.48768	-13.338	2.08e-30	2.1e-28	58.3987
EXOSC7	-0.173704	3.07164	-13.3109	2.55e-30	2.57e-28	58.1956
C5orf66-AS1	-0.510219	2.76021	-13.3037	2.7e-30	2.7e-28	58.1417
CYP3A5	-0.43516	2.63489	-13.3012	2.75e-30	2.74e-28	58.1234
KRT16	0.428794	3.6501	13.2932	2.92e-30	2.9e-28	58.0634
RAB11A	-0.1481	3.32209	-13.2665	3.57e-30	3.52e-28	57.8638
LEPR	-0.27234	2.58349	-13.2458	4.17e-30	4.1e-28	57.7092
ADH1B	-0.4228	2.32266	-13.2411	4.32e-30	4.23e-28	57.6746
DOCK9	-0.145635	2.78743	-13.234	4.56e-30	4.44e-28	57.6214
TIFA	-0.18464	2.70623	-13.2081	5.54e-30	5.37e-28	57.4278
TGFB1	0.169257	2.89316	13.1967	6.04e-30	5.83e-28	57.3423
IFITM3	0.14428	3.67498	13.1833	6.68e-30	6.41e-28	57.2423
C4orf48	0.238128	3.03306	13.1786	6.92e-30	6.61e-28	57.2072
KLHDC8A	-0.176883	2.57078	-13.1757	7.07e-30	6.73e-28	57.1857
COL27A1	0.193471	2.8579	13.1731	7.21e-30	6.83e-28	57.1665
ECM1	-0.315042	3.42026	-13.1713	7.31e-30	6.89e-28	57.153
MMP3	0.899748	3.06979	13.1545	8.29e-30	7.78e-28	57.0277
FGF14	-0.0735046	2.25711	-13.1382	9.38e-30	8.76e-28	56.9061
NDE1	0.135441	2.84077	13.132	9.83e-30	9.14e-28	56.8595
TPRN	-0.155981	2.7274	-13.1234	1.05e-29	9.71e-28	56.7952
BNC1	0.437995	2.92214	13.1117	1.15e-29	1.06e-27	56.7078
MMP10	0.939823	2.91183	13.0995	1.26e-29	1.15e-27	56.6168
LPCAT1	0.252785	3.10611	13.0949	1.3e-29	1.19e-27	56.5825
CRISP3	-1.1188	2.66829	-13.0943	1.31e-29	1.19e-27	56.5781
NRIP1	0.184118	3.38536	13.079	1.47e-29	1.33e-27	56.4639
RANBP9	-0.179051	3.11852	-13.0748	1.51e-29	1.36e-27	56.433
CDK4	0.109505	3.35423	13.0745	1.51e-29	1.36e-27	56.4308
NAGK	-0.133533	3.44126	-13.0691	1.58e-29	1.41e-27	56.3904
SYNGR1	-0.163062	2.88584	-13.0675	1.6e-29	1.42e-27	56.3784
LOC101928429	-0.375838	2.33128	-13.0539	1.77e-29	1.56e-27	56.2769
NID2	0.404623	3.00539	13.0535	1.77e-29	1.56e-27	56.2742
LRRC15	0.319231	2.70341	13.0517	1.8e-29	1.57e-27	56.2605
COBL	-0.335868	2.57253	-13.0517	1.8e-29	1.57e-27	56.2604
SMAGP	-0.263673	3.20218	-13.0231	2.23e-29	1.94e-27	56.0478
TAX1BP1	-0.0929698	3.30577	-13.0103	2.46e-29	2.13e-27	55.9516
USP6NL	-0.219638	2.53357	-12.9997	2.66e-29	2.3e-27	55.8729
CNPPD1	-0.120687	2.94504	-12.9975	2.71e-29	2.33e-27	55.8563
PLOD1	0.191957	3.13308	12.9902	2.86e-29	2.45e-27	55.8025
MGLL	-0.273792	3.26089	-12.9824	3.03e-29	2.58e-27	55.7444
MSN	0.109593	3.07553	12.9788	3.11e-29	2.64e-27	55.7176
LINC02036	-0.15523	2.26574	-12.9739	3.23e-29	2.73e-27	55.6808
SLC25A23	-0.221546	2.77327	-12.9683	3.37e-29	2.84e-27	55.6391
MB21D2	0.203965	2.98228	12.9586	3.62e-29	3.04e-27	55.5668
MICAL2	0.246121	2.78889	12.954	3.75e-29	3.13e-27	55.5323
TSPAN6	-0.234637	3.26975	-12.9356	4.31e-29	3.58e-27	55.3953
MAMDC2	-0.629139	2.8093	-12.9315	4.44e-29	3.68e-27	55.3647
COL8A1	0.344606	2.47267	12.9143	5.06e-29	4.17e-27	55.2365
FAM219B	-0.132975	2.90046	-12.9135	5.08e-29	4.18e-27	55.2313
SMIM5	-0.267852	3.03498	-12.9052	5.41e-29	4.43e-27	55.169
EPHX2	-0.339209	2.86629	-12.8986	5.69e-29	4.64e-27	55.1201
NTRK3	-0.0915279	2.55236	-12.896	5.8e-29	4.71e-27	55.1008
IL36A	-0.480986	2.79651	-12.8951	5.84e-29	4.73e-27	55.0937
AGTRAP	0.144503	2.96349	12.8741	6.84e-29	5.51e-27	54.9374
AHNAK	-0.126279	3.04612	-12.8713	6.98e-29	5.61e-27	54.9166
FAM221A	-0.215934	2.60206	-12.8636	7.4e-29	5.91e-27	54.8598
MUC20	-0.383548	2.71806	-12.8574	7.75e-29	6.17e-27	54.8136
FCGR2A	0.219021	2.64174	12.8472	8.37e-29	6.64e-27	54.7377
PLEKHG6	-0.209281	2.93785	-12.8386	8.93e-29	7.05e-27	54.6735
EDAR	-0.172556	2.78244	-12.82	1.03e-28	8.08e-27	54.5355
TUBA1C	0.0595638	3.80139	12.8183	1.04e-28	8.16e-27	54.5223
PRDX6	-0.0928729	3.53484	-12.7968	1.22e-28	9.54e-27	54.3627
PAX9	-0.46794	2.8303	-12.7695	1.5e-28	1.17e-26	54.1599
PDCD4	-0.168534	3.08756	-12.7692	1.5e-28	1.17e-26	54.1574
PAIP2B	-0.268302	2.78476	-12.7681	1.52e-28	1.17e-26	54.1494
ELMO2	-0.0963239	2.8812	-12.7639	1.56e-28	1.2e-26	54.1185
TAB3	-0.154955	2.62052	-12.7594	1.62e-28	1.24e-26	54.0846
ZFAND2B	-0.133919	3.02308	-12.7588	1.62e-28	1.24e-26	54.08
KAT2B	-0.262991	2.74906	-12.7483	1.76e-28	1.34e-26	54.002
RPL14	-0.098664	3.31811	-12.7479	1.76e-28	1.34e-26	53.9994
SMAD7	0.221402	2.86062	12.7371	1.91e-28	1.44e-26	53.9188
LRRC8D	0.159275	3.26551	12.7311	2e-28	1.5e-26	53.8745
SPNS2	-0.356749	2.96572	-12.7289	2.03e-28	1.52e-26	53.8578
SCGB1A1	-0.51562	2.50267	-12.7223	2.14e-28	1.59e-26	53.8093
FAM214A	-0.224555	2.97266	-12.722	2.14e-28	1.59e-26	53.8069
CHST11	0.310492	2.9182	12.7205	2.17e-28	1.61e-26	53.7955
ZNF532	0.168727	3.06414	12.712	2.31e-28	1.71e-26	53.7327
TMPRSS2	-0.259436	2.70583	-12.7107	2.33e-28	1.72e-26	53.7229
SASH1	-0.240786	3.2963	-12.7075	2.39e-28	1.75e-26	53.6989
NAV1	0.18823	2.9048	12.7069	2.4e-28	1.75e-26	53.6945
PRXL2C	0.211692	3.02792	12.6913	2.7e-28	1.96e-26	53.5787
ENDOU	-0.633269	2.92653	-12.6739	3.07e-28	2.23e-26	53.4495
CEACAM1	-0.364593	2.97484	-12.6732	3.09e-28	2.23e-26	53.4448
TUBA1B	0.056358	3.61047	12.6611	3.38e-28	2.44e-26	53.3547
MOB4	-0.110482	3.30524	-12.6606	3.39e-28	2.44e-26	53.3508
TNFRSF10B	0.195887	2.96393	12.6558	3.52e-28	2.51e-26	53.3154
SLC27A6	-0.394312	2.34112	-12.6556	3.52e-28	2.51e-26	53.314
NRG2	-0.112702	2.34735	-12.6522	3.61e-28	2.57e-26	53.2886
IFI16	0.128103	3.49612	12.6515	3.63e-28	2.57e-26	53.2835
SIRPA	0.169752	2.90121	12.6501	3.67e-28	2.58e-26	53.2733
STAT1	0.283121	3.26403	12.6501	3.67e-28	2.58e-26	53.2733
COL4A5	0.276049	2.7294	12.6395	3.97e-28	2.79e-26	53.1944
AFDN	-0.117805	2.598	-12.6271	4.36e-28	3.05e-26	53.1025
RAB32	0.141869	2.78491	12.6247	4.44e-28	3.09e-26	53.0849
IFI27	0.280098	3.62644	12.62	4.6e-28	3.19e-26	53.0498
ALAD	-0.145133	2.88277	-12.6068	5.08e-28	3.51e-26	52.9516
TNFAIP3	0.256482	3.33421	12.5885	5.82e-28	4.01e-26	52.8161
C4orf3	-0.118883	3.43613	-12.5824	6.09e-28	4.18e-26	52.7712
DRAM1	0.236877	3.00104	12.5626	7.07e-28	4.84e-26	52.624
FAM89A	0.357318	3.03414	12.5605	7.17e-28	4.9e-26	52.609
LINC01315	-0.237692	2.76599	-12.549	7.82e-28	5.32e-26	52.5231
GSTM5	-0.137916	2.80611	-12.5484	7.86e-28	5.33e-26	52.5188
LYVE1	-0.394102	2.69206	-12.5265	9.25e-28	6.25e-26	52.3569
SPINT1	-0.133527	2.97315	-12.5194	9.76e-28	6.57e-26	52.3043
UPK3B	-0.234808	2.84212	-12.5125	1.03e-27	6.9e-26	52.2527
GOLGA4	-0.104864	3.25276	-12.51	1.05e-27	7.01e-26	52.2342
PTK7	0.180104	2.73917	12.5091	1.05e-27	7.03e-26	52.2281
ADAM12	0.351108	2.70815	12.5076	1.07e-27	7.09e-26	52.2168
SUCLG2	-0.124875	3.01133	-12.504	1.09e-27	7.26e-26	52.1901
DHRS11	-0.262285	2.69695	-12.5035	1.1e-27	7.26e-26	52.1866
PTGFRN	0.181698	3.33893	12.4881	1.23e-27	8.12e-26	52.0725
CYP11A1	-0.240677	2.47663	-12.4793	1.32e-27	8.65e-26	52.007
MMP9	0.446181	3.23583	12.4786	1.32e-27	8.66e-26	52.0022
PPP1R7	-0.0828731	3.161	-12.478	1.33e-27	8.67e-26	51.9978
CTSC	0.211	3.25465	12.4636	1.48e-27	9.63e-26	51.8913
ANXA9	-0.542263	2.72548	-12.4573	1.55e-27	1.01e-25	51.844
PHACTR4	-0.16769	3.12107	-12.4565	1.56e-27	1.01e-25	51.8384
EPS8L1	-0.29038	3.04562	-12.4493	1.65e-27	1.06e-25	51.7851
SH3PXD2B	0.137728	2.93199	12.3942	2.49e-27	1.6e-25	51.3779
ST3GAL4	-0.114005	2.52772	-12.3877	2.61e-27	1.67e-25	51.3293
CRYL1	-0.177246	2.96978	-12.3788	2.79e-27	1.78e-25	51.2637
SLITRK5	-0.210488	2.3302	-12.3756	2.86e-27	1.82e-25	51.2402
WDR26	-0.104603	3.05043	-12.3598	3.21e-27	2.04e-25	51.1235
SLK	-0.131772	3.32966	-12.3413	3.69e-27	2.33e-25	50.9866
SLC26A2	-0.267025	3.18638	-12.3376	3.79e-27	2.39e-25	50.9597
FMNL2	0.204686	2.75318	12.3348	3.87e-27	2.43e-25	50.9387
IKBIP	0.239271	2.67489	12.3343	3.89e-27	2.44e-25	50.9349
SLC39A6	0.19625	3.25391	12.3274	4.09e-27	2.56e-25	50.8837
E2F3	0.13145	3.02073	12.326	4.13e-27	2.57e-25	50.874
CAPN14	-0.827108	2.62228	-12.3227	4.24e-27	2.63e-25	50.8491
TMEM132C	-0.127474	2.67853	-12.3214	4.28e-27	2.65e-25	50.8399
SEC24C	-0.101084	3.24197	-12.32	4.32e-27	2.66e-25	50.8296
ARPC1B	0.162794	3.45906	12.3199	4.33e-27	2.66e-25	50.8286
SHC1	0.157808	3.27647	12.3099	4.66e-27	2.86e-25	50.7551
CAPNS1	-0.0902171	3.54654	-12.3089	4.7e-27	2.87e-25	50.7478
IRF9	0.161325	3.36148	12.3084	4.72e-27	2.88e-25	50.7435
GNA12	0.141873	3.04308	12.307	4.76e-27	2.9e-25	50.7338
FAM149A	-0.200405	2.31921	-12.2997	5.03e-27	3.05e-25	50.6797
TMEM45A	0.402253	3.38312	12.2955	5.19e-27	3.14e-25	50.6482
FAT1	0.234473	3.32072	12.2932	5.28e-27	3.18e-25	50.6314
ANKRD35	-0.349488	2.91094	-12.2804	5.81e-27	3.49e-25	50.5367
MYH9	0.122971	3.34273	12.2797	5.84e-27	3.5e-25	50.5322
PARP12	0.212279	3.20503	12.2749	6.05e-27	3.61e-25	50.4967
KIAA1211L	-0.178088	2.61161	-12.273	6.14e-27	3.65e-25	50.4828
SOCS3	0.208549	2.7901	12.2726	6.15e-27	3.65e-25	50.4799
BCAS1	-0.213349	2.65603	-12.2591	6.81e-27	4.03e-25	50.3802
CA13	-0.228635	2.76555	-12.2558	6.98e-27	4.12e-25	50.3557
CHP1	-0.126134	3.25612	-12.2477	7.41e-27	4.36e-25	50.2959
ALKBH7	-0.0906369	2.83499	-12.2288	8.53e-27	5.01e-25	50.1568
FAM189A2	-0.277172	2.73741	-12.2245	8.81e-27	5.16e-25	50.1249
MSANTD3	0.235697	2.76822	12.2141	9.52e-27	5.56e-25	50.0479
CUL3	-0.107671	2.89667	-12.1994	1.06e-26	6.18e-25	49.9399
PLOD3	0.166769	3.17175	12.1917	1.12e-26	6.52e-25	49.8832
CIPC	-0.197466	2.95975	-12.1911	1.13e-26	6.54e-25	49.8785
MAPK3	-0.10407	3.25293	-12.1896	1.14e-26	6.57e-25	49.8677
NETO2	0.342537	2.94282	12.1896	1.14e-26	6.57e-25	49.8676
TJP1	-0.146864	3.34179	-12.1811	1.22e-26	6.98e-25	49.8051
TTYH1	-0.185783	2.4034	-12.1783	1.24e-26	7.11e-25	49.7843
ADGRF1	-0.288126	2.48312	-12.1779	1.25e-26	7.11e-25	49.7811
ADAR	0.100689	3.54297	12.1769	1.25e-26	7.14e-25	49.7741
DIPK1A	0.145523	2.69023	12.1732	1.29e-26	7.32e-25	49.7468
ID4	-0.256755	2.7528	-12.1667	1.35e-26	7.65e-25	49.699
EPS8L2	-0.186191	2.75687	-12.1666	1.35e-26	7.65e-25	49.6984
CD276	0.149164	2.77639	12.1588	1.44e-26	8.08e-25	49.6407
ABAT	-0.305705	2.67992	-12.1434	1.61e-26	9.04e-25	49.5274
TNC	0.352117	2.98364	12.1354	1.71e-26	9.57e-25	49.4684
CXCL8	0.673181	3.15797	12.1279	1.81e-26	1.01e-24	49.4132
CXCL1	0.530258	3.09055	12.1267	1.82e-26	1.01e-24	49.4041
ABL2	0.197783	2.85824	12.1266	1.82e-26	1.01e-24	49.4038
CSGALNACT2	0.172203	3.0203	12.1139	2e-26	1.11e-24	49.31
MACF1	0.0993854	3.167	12.1113	2.04e-26	1.13e-24	49.2909
FLNA	0.155314	3.34894	12.0977	2.26e-26	1.25e-24	49.1912
SLC44A2	-0.137911	3.11458	-12.0948	2.31e-26	1.27e-24	49.1698
CHPF2	0.116083	3.04894	12.0938	2.33e-26	1.28e-24	49.1619
NREP	0.233397	2.92377	12.0789	2.6e-26	1.42e-24	49.0528
SUOX	-0.154668	2.74348	-12.0751	2.67e-26	1.46e-24	49.0247
ATP13A4	-0.326548	2.53897	-12.071	2.76e-26	1.5e-24	48.9947
NFIL3	0.247417	3.1402	12.0507	3.21e-26	1.74e-24	48.8449
MTCL1	0.255873	2.98146	12.0419	3.42e-26	1.85e-24	48.7809
OSMR	0.248772	2.96318	12.034	3.63e-26	1.95e-24	48.7228
AADAC	-0.439354	2.59059	-12.0338	3.63e-26	1.95e-24	48.7211
LAPTM4B	0.17775	3.40072	12.0336	3.64e-26	1.95e-24	48.7198
MIOS	-0.129807	2.92733	-12.0306	3.72e-26	1.99e-24	48.6979
HLF	-0.508247	2.73829	-12.0283	3.78e-26	2.02e-24	48.6809
DMAC2L	-0.103779	2.71954	-12.0206	4.01e-26	2.13e-24	48.6244
ASPA	-0.218393	2.34141	-12.0129	4.24e-26	2.25e-24	48.5677
PTPRK	0.169548	2.99372	12.0073	4.42e-26	2.34e-24	48.5265
ABLIM3	-0.239342	2.85161	-12.0053	4.49e-26	2.37e-24	48.5116
CHST2	0.252274	2.64479	11.9939	4.88e-26	2.57e-24	48.4282
FCHO2	-0.151678	2.92997	-11.9912	4.98e-26	2.62e-24	48.4085
IFI30	0.224217	3.50019	11.9581	6.37e-26	3.34e-24	48.1655
GMDS	-0.174589	2.78121	-11.9431	7.12e-26	3.72e-24	48.0551
EIF4E3	-0.176631	2.73076	-11.9208	8.4e-26	4.38e-24	47.8915
C5AR1	0.350856	2.86961	11.9184	8.55e-26	4.45e-24	47.8736
ARHGAP20	-0.137369	2.53494	-11.9158	8.71e-26	4.52e-24	47.8548
GALNT2	0.167715	3.0313	11.9152	8.75e-26	4.53e-24	47.8506
PPP2R2A	-0.109146	2.97726	-11.8963	1.01e-25	5.2e-24	47.712
HEXB	0.0970373	3.44525	11.8949	1.02e-25	5.24e-24	47.7018
PLXNA1	0.100859	2.80512	11.8935	1.03e-25	5.28e-24	47.6916
COX6B1	-0.0668379	3.5813	-11.8858	1.09e-25	5.57e-24	47.6353
CRTAC1	-0.118927	2.43715	-11.8813	1.12e-25	5.75e-24	47.6023
EPB41L4A-DT	-0.12999	2.41947	-11.8686	1.24e-25	6.3e-24	47.5088
LLGL2	-0.175858	2.70211	-11.8477	1.44e-25	7.33e-24	47.3561
BST2	0.369552	3.25023	11.8406	1.52e-25	7.71e-24	47.3036
EZH1	-0.0748252	2.6504	-11.8401	1.53e-25	7.72e-24	47.3003
DIAPH1	-0.0741372	2.93735	-11.8343	1.59e-25	8.04e-24	47.2581
ARHGAP5-AS1	-0.201779	2.80206	-11.8312	1.63e-25	8.21e-24	47.2349
NNMT	0.309065	3.06151	11.829	1.66e-25	8.32e-24	47.2193
SLC44A3	-0.315399	2.70842	-11.826	1.69e-25	8.48e-24	47.1973
CCNG2	-0.148813	3.00739	-11.8227	1.73e-25	8.67e-24	47.173
COX5A	-0.0949262	3.20374	-11.8146	1.84e-25	9.19e-24	47.1133
F2R	0.145004	2.94076	11.8069	1.95e-25	9.71e-24	47.0569
RNF169	-0.129995	3.09022	-11.8022	2.02e-25	1e-23	47.0225
ACOX3	-0.177611	2.9696	-11.7901	2.21e-25	1.09e-23	46.9341
NOX4	0.327666	2.41042	11.7892	2.22e-25	1.1e-23	46.9275
IFNGR1	0.126533	3.37192	11.7877	2.25e-25	1.11e-23	46.9172
GJA1	0.177735	3.69089	11.787	2.26e-25	1.11e-23	46.9115
ITGA6	0.183306	3.19558	11.7861	2.27e-25	1.12e-23	46.9049
TMOD3	-0.168541	2.96721	-11.781	2.36e-25	1.15e-23	46.8681
CXCL10	0.578824	3.23729	11.7651	2.65e-25	1.3e-23	46.7518
PTHLH	0.712204	2.92337	11.7646	2.66e-25	1.3e-23	46.7482
TGIF1	0.183238	2.89906	11.7592	2.77e-25	1.35e-23	46.7086
VCAN	0.397385	3.23702	11.7543	2.87e-25	1.39e-23	46.673
AR	-0.173766	2.45781	-11.7454	3.07e-25	1.48e-23	46.6074
SORCS1	-0.0962375	2.25002	-11.7373	3.26e-25	1.57e-23	46.5484
DCBLD1	0.316532	2.9488	11.7345	3.33e-25	1.6e-23	46.5281
PRSS27	-0.566257	2.96033	-11.7341	3.34e-25	1.6e-23	46.525
ECRG4	-0.361611	2.3767	-11.7198	3.71e-25	1.78e-23	46.4204
AIFM2	-0.148738	2.82143	-11.7185	3.74e-25	1.79e-23	46.4111
PLLP	-0.316651	2.89129	-11.7093	4.01e-25	1.91e-23	46.3439
GDPD3	-0.390466	3.0195	-11.698	4.36e-25	2.07e-23	46.2611
CHN1	0.214763	3.14937	11.6911	4.58e-25	2.17e-23	46.2112
HLA-A	0.097683	3.79238	11.6862	4.75e-25	2.25e-23	46.1756
C5orf66	-0.109345	2.9474	-11.6812	4.93e-25	2.33e-23	46.1389
VPS37B	-0.155471	3.20335	-11.6804	4.96e-25	2.34e-23	46.1326
PEG3	-0.551335	2.42536	-11.6798	4.98e-25	2.34e-23	46.1286
ZNF554	-0.0974363	2.71438	-11.6767	5.1e-25	2.39e-23	46.1059
DDAH2	-0.140579	3.03755	-11.6756	5.14e-25	2.4e-23	46.0979
TAP1	0.215207	3.33125	11.675	5.16e-25	2.41e-23	46.0937
PPT1	0.0953473	3.48652	11.6741	5.19e-25	2.42e-23	46.0873
KLF10	0.151572	3.38817	11.6736	5.21e-25	2.42e-23	46.0834
NR3C2	-0.336065	2.41968	-11.671	5.32e-25	2.46e-23	46.064
SECISBP2L	-0.131782	2.74639	-11.6709	5.32e-25	2.46e-23	46.0633
JOSD1	0.0913995	3.30271	11.6595	5.79e-25	2.67e-23	45.9803
SERPINB11	-0.695533	2.64461	-11.6576	5.87e-25	2.7e-23	45.9666
PLEKHA7	-0.266423	2.80924	-11.6516	6.13e-25	2.82e-23	45.9228
LOC101927490	-0.166552	2.21726	-11.6418	6.59e-25	3.02e-23	45.8515
SEMA3C	0.403759	2.96142	11.6416	6.6e-25	3.02e-23	45.8498
OCLN	-0.242026	2.78122	-11.6412	6.62e-25	3.02e-23	45.8467
IRS1	0.289083	2.81099	11.6395	6.7e-25	3.05e-23	45.8349
CYP4B1	-0.462205	2.68981	-11.637	6.83e-25	3.1e-23	45.8165
PDHB	-0.0917442	3.2661	-11.6261	7.4e-25	3.36e-23	45.7368
GPT2	-0.343726	2.99696	-11.6073	8.5e-25	3.85e-23	45.5999
NBEAL2	-0.150972	2.8357	-11.5819	1.02e-24	4.62e-23	45.415
HLA-B	0.119583	3.76453	11.5727	1.1e-24	4.94e-23	45.3481
AKTIP	-0.132998	3.08347	-11.5712	1.11e-24	4.98e-23	45.3371
XPR1	0.190184	2.84727	11.56	1.2e-24	5.4e-23	45.2556
SLC9A8	-0.150157	2.72806	-11.5523	1.27e-24	5.69e-23	45.1993
SPAG16	-0.144484	2.41366	-11.5523	1.27e-24	5.69e-23	45.1993
ASB8	-0.101938	2.88594	-11.5482	1.31e-24	5.85e-23	45.1698
MARVELD1	0.0970863	2.91332	11.5437	1.36e-24	6.03e-23	45.1365
NDNF	-0.321991	2.48645	-11.539	1.4e-24	6.23e-23	45.1026
BTG3	0.159751	2.94123	11.5318	1.48e-24	6.56e-23	45.0503
GATD3A	-0.102815	3.14129	-11.5228	1.58e-24	6.99e-23	44.9848
CASK	0.153523	2.76375	11.5161	1.66e-24	7.33e-23	44.9361
LMBRD1	-0.0973484	2.90442	-11.5148	1.68e-24	7.38e-23	44.9268
MMAB	-0.108255	2.72095	-11.5135	1.69e-24	7.44e-23	44.917
BICDL2	-0.26454	2.98101	-11.5129	1.7e-24	7.45e-23	44.913
EPB41L4A	-0.168022	2.50061	-11.5127	1.7e-24	7.45e-23	44.9115
BAX	0.171418	2.84209	11.5101	1.74e-24	7.57e-23	44.8924
PFDN2	0.107697	3.30466	11.5087	1.75e-24	7.64e-23	44.8822
CTNNA1	-0.0797167	3.27159	-11.4974	1.91e-24	8.28e-23	44.7999
PDLIM2	-0.141681	2.74575	-11.4972	1.91e-24	8.28e-23	44.7985
BCKDHB	-0.162625	2.72383	-11.4947	1.94e-24	8.41e-23	44.7807
SLC16A6	-0.347636	2.92739	-11.4939	1.96e-24	8.44e-23	44.7744
UBE2L6	0.188449	3.36269	11.4923	1.98e-24	8.52e-23	44.7633
APOL1	0.2713	3.10935	11.4913	1.99e-24	8.57e-23	44.7557
COL12A1	0.314782	2.99823	11.4838	2.11e-24	9.03e-23	44.7017
SMIM3	0.259957	3.06871	11.4801	2.16e-24	9.26e-23	44.6744
EVPL	-0.25772	3.16353	-11.4747	2.25e-24	9.61e-23	44.6355
ZNF697	0.162266	2.60682	11.4719	2.3e-24	9.8e-23	44.6149
TGFBI	0.254217	3.55058	11.466	2.4e-24	1.02e-22	44.5719
PEBP1	-0.103671	3.42006	-11.4646	2.42e-24	1.03e-22	44.5618
LHFPL2	0.171658	3.13129	11.4637	2.44e-24	1.03e-22	44.5556
EPSTI1	0.373879	3.04085	11.4563	2.58e-24	1.09e-22	44.5014
FBLIM1	0.206187	3.04662	11.4471	2.76e-24	1.16e-22	44.4345
EPPK1	0.276963	2.94708	11.4418	2.87e-24	1.21e-22	44.3964
ALDH9A1	-0.146532	3.43567	-11.4287	3.16e-24	1.33e-22	44.3011
ACAA1	-0.117113	3.19721	-11.4234	3.28e-24	1.37e-22	44.2631
KLF8	-0.236153	2.7373	-11.4206	3.35e-24	1.4e-22	44.2427
WNK4	-0.151238	2.3271	-11.4156	3.47e-24	1.45e-22	44.2063
LMO7	-0.247593	2.7633	-11.392	4.13e-24	1.72e-22	44.0348
SNX10	0.346317	3.02928	11.3915	4.14e-24	1.72e-22	44.0313
LAMB4	-0.189762	2.19058	-11.3861	4.31e-24	1.79e-22	43.9925
TNFRSF1A	0.0938346	3.34052	11.3855	4.33e-24	1.79e-22	43.9881
LOC101927972	-0.223139	2.14243	-11.383	4.41e-24	1.82e-22	43.9698
ZNF710	-0.0811133	2.67514	-11.3804	4.5e-24	1.85e-22	43.9506
P3H4	0.20261	2.78071	11.3664	4.98e-24	2.05e-22	43.8497
IFI44	0.3543	3.05608	11.3626	5.12e-24	2.1e-22	43.8219
ANGPT2	0.260249	2.70433	11.3622	5.13e-24	2.1e-22	43.8189
PGM5	-0.159465	2.40327	-11.362	5.14e-24	2.1e-22	43.8176
COX7C	-0.0750789	3.51129	-11.3501	5.61e-24	2.29e-22	43.7317
MEIS2	-0.228785	3.12972	-11.3427	5.92e-24	2.41e-22	43.6778
C9orf152	-0.318724	2.17853	-11.3399	6.05e-24	2.46e-22	43.6572
FAM95A	-0.1847	2.43381	-11.3295	6.52e-24	2.65e-22	43.5819
MDFIC	-0.162425	2.85895	-11.3294	6.53e-24	2.65e-22	43.5812
ACOX2	-0.205792	2.57632	-11.3287	6.56e-24	2.65e-22	43.5762
NRP2	0.145837	2.61066	11.326	6.69e-24	2.7e-22	43.5572
LOC101927752	-0.185328	2.85428	-11.3163	7.18e-24	2.89e-22	43.4867
CERS2	0.0950403	3.27019	11.2985	8.18e-24	3.29e-22	43.3579
IGSF10	-0.287609	2.62529	-11.2932	8.5e-24	3.41e-22	43.3195
ADAMTS12	0.20681	2.72694	11.29	8.7e-24	3.49e-22	43.2966
RNF10	-0.0954736	3.15195	-11.2872	8.89e-24	3.55e-22	43.2758
ATP5PB	-0.068552	3.13287	-11.2844	9.07e-24	3.62e-22	43.2557
MACC1	-0.329822	2.698	-11.2839	9.1e-24	3.62e-22	43.2523
ANXA11	-0.116885	3.15491	-11.2833	9.14e-24	3.63e-22	43.248
CSTB	-0.222024	3.46691	-11.2716	9.96e-24	3.95e-22	43.1634
LMO2	-0.128853	2.69739	-11.2585	1.1e-23	4.34e-22	43.0686
CHMP2A	-0.0703755	3.44364	-11.2582	1.1e-23	4.34e-22	43.0662
CALU	0.157261	3.16443	11.2569	1.11e-23	4.37e-22	43.0568
SLC39A14	0.195699	2.60719	11.249	1.17e-23	4.62e-22	42.9999
MAML3	-0.125704	2.61724	-11.2384	1.27e-23	4.99e-22	42.9232
PDCD6IP	-0.0871851	3.30033	-11.2363	1.29e-23	5.05e-22	42.908
ASPN	0.433476	3.17842	11.2337	1.31e-23	5.14e-22	42.8892
ABR	-0.100338	3.0941	-11.23	1.35e-23	5.27e-22	42.8631
ECHDC2	-0.210312	3.14238	-11.2239	1.41e-23	5.5e-22	42.819
FPR3	0.269101	2.91847	11.2184	1.47e-23	5.71e-22	42.7792
MYO5B	-0.198759	2.83281	-11.2175	1.48e-23	5.74e-22	42.7723
NSUN7	-0.142752	2.18393	-11.2011	1.67e-23	6.46e-22	42.6544
PITX1	-0.254579	2.91074	-11.1978	1.71e-23	6.6e-22	42.6302
DCXR	-0.143437	3.23602	-11.1928	1.77e-23	6.83e-22	42.5942
ITGA3	0.289344	2.96098	11.1927	1.77e-23	6.83e-22	42.5938
MINDY1	-0.099164	3.20765	-11.1912	1.79e-23	6.89e-22	42.5827
NFIA	-0.176679	2.8321	-11.1863	1.86e-23	7.13e-22	42.547
CLSTN1	0.10557	3.40864	11.1829	1.9e-23	7.29e-22	42.5229
HLA-C	0.105868	3.69791	11.1718	2.06e-23	7.89e-22	42.4427
GPNMB	0.212027	3.31412	11.1644	2.18e-23	8.31e-22	42.3898
TPST1	0.220913	2.98472	11.1569	2.3e-23	8.76e-22	42.3354
SOX4	0.152273	2.91598	11.1545	2.34e-23	8.9e-22	42.3184
VMP1	0.146997	3.45658	11.1524	2.38e-23	9.02e-22	42.3026
KIRREL1	0.126563	2.67878	11.15	2.42e-23	9.16e-22	42.2856
TRIO	0.139201	2.77612	11.1495	2.43e-23	9.18e-22	42.282
FCGR3A	0.428668	2.90302	11.1464	2.48e-23	9.37e-22	42.2599
ATP5PO	-0.0631257	3.17667	-11.1365	2.67e-23	1.01e-21	42.1883
CGAS	0.140154	2.44101	11.131	2.78e-23	1.04e-21	42.149
STAT2	0.118043	3.07161	11.1279	2.84e-23	1.07e-21	42.1265
LRRFIP2	-0.101254	2.81595	-11.1217	2.97e-23	1.11e-21	42.0819
OR7E47P	-0.188516	2.69875	-11.1181	3.05e-23	1.14e-21	42.0557
LGALS1	0.164176	3.69447	11.1098	3.24e-23	1.21e-21	41.9961
ACADSB	-0.232801	2.56335	-11.1098	3.24e-23	1.21e-21	41.9961
PRADC1	-0.115646	2.98302	-11.1071	3.3e-23	1.23e-21	41.9767
SPRY4	0.163163	2.70294	11.1016	3.44e-23	1.28e-21	41.9374
IFI35	0.235199	3.1483	11.0906	3.72e-23	1.38e-21	41.8581
SERPINB6	-0.0884074	2.6008	-11.0862	3.84e-23	1.42e-21	41.8263
RALGPS1	-0.0878264	2.50437	-11.0846	3.89e-23	1.44e-21	41.8147
HDAC5	-0.0988777	2.88579	-11.0842	3.9e-23	1.44e-21	41.8118
PTPRZ1	0.336713	3.20621	11.0748	4.18e-23	1.54e-21	41.7446
CEBPD	0.174933	3.06194	11.0737	4.21e-23	1.55e-21	41.7365
CDH11	0.288439	2.73142	11.0601	4.65e-23	1.71e-21	41.6382
FCGR1A	0.193812	2.53693	11.0534	4.88e-23	1.79e-21	41.5902
DDX60	0.299768	3.22092	11.0486	5.05e-23	1.85e-21	41.5556
CBR3-AS1	-0.090791	2.63816	-11.0469	5.12e-23	1.87e-21	41.5438
TMEM138	0.111464	3.1873	11.0452	5.18e-23	1.89e-21	41.5312
NCOA1	-0.118853	2.93829	-11.0414	5.32e-23	1.93e-21	41.5044
MTHFD2	0.129987	2.96761	11.0414	5.32e-23	1.93e-21	41.5041
ZDHHC20	-0.11626	3.0873	-11.0275	5.89e-23	2.13e-21	41.4045
SULF1	0.387559	3.12335	11.022	6.13e-23	2.22e-21	41.3646
ACVR1	0.151865	3.19509	11.0192	6.25e-23	2.26e-21	41.345
CTTNBP2	-0.282739	2.66603	-11.01	6.69e-23	2.41e-21	41.2783
MAOB	-0.147712	2.43621	-11.0051	6.93e-23	2.49e-21	41.2436
PTK6	-0.244103	3.12439	-11.0049	6.94e-23	2.49e-21	41.2418
EGFL6	0.332722	3.0598	10.9922	7.61e-23	2.73e-21	41.1509
ARHGAP27	-0.108882	2.63152	-10.9869	7.91e-23	2.83e-21	41.1125
ACOT9	0.158249	3.04833	10.9851	8.01e-23	2.86e-21	41.0997
STK3	0.139698	2.78547	10.9794	8.35e-23	2.98e-21	41.0593
C1QTNF6	0.212719	2.62495	10.9746	8.64e-23	3.08e-21	41.0247
TRNP1	-0.225173	2.74279	-10.9713	8.85e-23	3.15e-21	41.0012
RALA	-0.0930588	3.44881	-10.9696	8.97e-23	3.18e-21	40.9884
KRT40	-0.11738	2.06339	-10.9622	9.46e-23	3.35e-21	40.9354
RBM47	-0.136466	2.85014	-10.9581	9.74e-23	3.45e-21	40.9065
GALNT18	0.156636	2.7423	10.9508	1.03e-22	3.63e-21	40.8542
NDUFS7	-0.0829799	2.87973	-10.9484	1.05e-22	3.69e-21	40.8364
ADCY3	0.107469	2.91876	10.9429	1.09e-22	3.83e-21	40.7975
GFOD2	-0.149177	2.9573	-10.9356	1.15e-22	4.03e-21	40.7452
SSH1	0.102493	2.76837	10.9326	1.17e-22	4.11e-21	40.7232
TLR2	0.241427	3.19943	10.9303	1.19e-22	4.17e-21	40.7069
GPR176	0.202069	2.80408	10.9228	1.26e-22	4.39e-21	40.6536
WDR54	0.174238	3.10488	10.9227	1.26e-22	4.39e-21	40.6527
ADGRD1	-0.274239	2.47418	-10.9174	1.31e-22	4.56e-21	40.6146
VAV2	0.146339	2.7751	10.9125	1.36e-22	4.71e-21	40.5793
HAS3	0.235559	2.85826	10.9073	1.41e-22	4.89e-21	40.5421
SPP1	0.504954	2.71357	10.9035	1.45e-22	5.01e-21	40.5153
B3GALT5	-0.193508	2.5147	-10.8985	1.5e-22	5.19e-21	40.4796
EXOC1	-0.0804485	3.34892	-10.8952	1.54e-22	5.3e-21	40.4559
MIGA2	-0.117756	2.9637	-10.8938	1.55e-22	5.35e-21	40.4457
NYNRIN	-0.209062	2.91823	-10.8905	1.59e-22	5.47e-21	40.4222
MMD	0.146588	2.81784	10.8875	1.62e-22	5.58e-21	40.4006
COA3	-0.0790788	3.01301	-10.8863	1.64e-22	5.62e-21	40.392
ITPR2	-0.177658	2.82838	-10.8831	1.68e-22	5.74e-21	40.3691
SPARC	0.204137	3.52043	10.8785	1.73e-22	5.92e-21	40.3365
NDUFB8	-0.0673692	3.27906	-10.8783	1.74e-22	5.92e-21	40.335
GBP1	0.272804	3.25062	10.8777	1.74e-22	5.94e-21	40.3303
SERHL2	-0.0799472	2.58929	-10.8763	1.76e-22	5.99e-21	40.3203
USB1	0.123763	2.74887	10.8741	1.79e-22	6.08e-21	40.3048
LMAN2	-0.070837	2.85246	-10.869	1.86e-22	6.3e-21	40.2681
COL13A1	0.132762	2.77514	10.8667	1.89e-22	6.39e-21	40.2518
VPS4B	-0.122675	3.37683	-10.8578	2.01e-22	6.8e-21	40.1885
CRISPLD2	0.150237	2.87978	10.8531	2.08e-22	7.03e-21	40.1545
DBNDD1	-0.162371	2.5961	-10.8508	2.12e-22	7.13e-21	40.138
RBPMS-AS1	-0.0993202	2.60178	-10.8452	2.2e-22	7.41e-21	40.0982
EML3	-0.0970643	2.89756	-10.8435	2.23e-22	7.5e-21	40.0857
TEAD4	0.181421	2.93094	10.8421	2.26e-22	7.56e-21	40.0758
IL1RN	-0.266888	3.1959	-10.8365	2.35e-22	7.86e-21	40.0363
GALNS	0.0917877	2.72852	10.8362	2.35e-22	7.86e-21	40.0338
LAMC1	0.136156	3.31231	10.8333	2.4e-22	8.02e-21	40.013
SPSB3	-0.0912752	3.11844	-10.8317	2.43e-22	8.09e-21	40.0017
SSBP2	-0.143725	2.54972	-10.8315	2.43e-22	8.09e-21	40.0002
SAP18	-0.0993996	3.19286	-10.8306	2.45e-22	8.13e-21	39.9939
TMEM158	0.329769	2.8231	10.8241	2.57e-22	8.51e-21	39.9476
RPS6KC1	0.136902	2.98879	10.823	2.59e-22	8.56e-21	39.9396
STX7	-0.0875467	2.80638	-10.8221	2.61e-22	8.61e-21	39.9328
FAM92A	0.160945	2.70317	10.8125	2.79e-22	9.21e-21	39.8645
PEPD	-0.104193	3.14316	-10.8113	2.82e-22	9.27e-21	39.8563
KLF7	0.215642	2.83443	10.807	2.9e-22	9.55e-21	39.8256
RORC	-0.1288	2.77468	-10.7947	3.17e-22	1.04e-20	39.7374
PPP1R14C	0.244982	3.25174	10.7905	3.27e-22	1.07e-20	39.7077
PARP14	0.150684	2.8286	10.7897	3.29e-22	1.08e-20	39.7019
TMEM80	-0.157596	2.909	-10.7836	3.44e-22	1.12e-20	39.6581
TMEM184A	-0.167073	2.97838	-10.7798	3.53e-22	1.15e-20	39.6314
MAGI3	-0.153047	2.55962	-10.7792	3.55e-22	1.16e-20	39.6271
ACSL4	0.193928	2.79611	10.7778	3.59e-22	1.17e-20	39.617
MSRA	-0.082436	2.66207	-10.7686	3.83e-22	1.24e-20	39.551
EIF2AK2	0.131875	3.04815	10.7567	4.17e-22	1.35e-20	39.4667
ELF4	0.117833	3.05409	10.7543	4.25e-22	1.37e-20	39.4497
TNS4	0.170022	3.08498	10.7512	4.34e-22	1.4e-20	39.4271
SCN7A	-0.190547	2.08761	-10.7463	4.5e-22	1.45e-20	39.3926
NCF2	0.253834	3.03671	10.7422	4.63e-22	1.49e-20	39.3632
PHLDB2	0.197979	2.54403	10.714	5.68e-22	1.82e-20	39.1626
BEX3	0.102677	3.60302	10.714	5.68e-22	1.82e-20	39.1621
USO1	-0.0856012	3.35665	-10.7116	5.78e-22	1.85e-20	39.145
C6orf132	-0.278107	3.01843	-10.7056	6.03e-22	1.93e-20	39.1027
MUC1	-0.281265	2.98979	-10.7048	6.06e-22	1.94e-20	39.0971
FHIT	-0.140148	2.36579	-10.7028	6.15e-22	1.96e-20	39.0829
IFITM1	0.167255	3.56577	10.6956	6.48e-22	2.06e-20	39.0316
GSTO1	0.0922394	3.49268	10.692	6.65e-22	2.12e-20	39.006
RBP7	-0.317687	2.81368	-10.684	7.04e-22	2.24e-20	38.9492
GSDME	0.29327	3.21911	10.6718	7.69e-22	2.44e-20	38.8622
ACADVL	-0.093923	3.43905	-10.6694	7.82e-22	2.48e-20	38.8453
GSEC	0.144159	2.45971	10.6669	7.97e-22	2.52e-20	38.8274
FAM3B	-0.627096	2.95712	-10.6661	8.01e-22	2.53e-20	38.8219
OLFML2B	0.27806	3.09823	10.6549	8.68e-22	2.74e-20	38.7422
TDRD3	-0.10828	2.75628	-10.6532	8.79e-22	2.77e-20	38.7298
ZDHHC11	-0.299117	2.84215	-10.649	9.06e-22	2.85e-20	38.7005
RPL15	-0.0758586	3.36447	-10.6434	9.43e-22	2.96e-20	38.6604
BID	0.138563	3.00146	10.6416	9.56e-22	2.99e-20	38.6474
POGLUT2	0.222096	2.84599	10.6273	1.06e-21	3.31e-20	38.5463
ITGB4	0.15377	2.88119	10.6238	1.09e-21	3.39e-20	38.521
AMY1A	-0.475104	2.66242	-10.6156	1.15e-21	3.59e-20	38.463
MPP7	-0.262042	2.75882	-10.607	1.22e-21	3.81e-20	38.4022
LRP10	-0.110634	3.15783	-10.6045	1.25e-21	3.88e-20	38.3841
S100A7	0.39339	3.71984	10.5996	1.29e-21	4.01e-20	38.3494
TNFRSF12A	0.221069	3.17323	10.5989	1.3e-21	4.02e-20	38.3445
INMT	-0.202349	2.64183	-10.594	1.34e-21	4.16e-20	38.3095
MICOS10	-0.0650088	3.16184	-10.5803	1.48e-21	4.58e-20	38.2125
MAL	-0.6412	3.33591	-10.5722	1.57e-21	4.85e-20	38.1556
DCAF11	-0.085978	2.98082	-10.5711	1.58e-21	4.88e-20	38.1473
CNKSR3	-0.154368	2.53146	-10.5701	1.6e-21	4.91e-20	38.14
EXPH5	-0.269663	2.89316	-10.5695	1.6e-21	4.92e-20	38.1362
ABCA8	-0.273004	2.46422	-10.5691	1.61e-21	4.93e-20	38.1333
ZNF431	-0.212801	2.63333	-10.5684	1.62e-21	4.95e-20	38.1281
LRATD2	-0.134793	3.02086	-10.5639	1.67e-21	5.1e-20	38.0966
BLOC1S1	-0.080397	3.00292	-10.5615	1.7e-21	5.18e-20	38.0797
ASAH1	-0.104697	3.20188	-10.5612	1.7e-21	5.18e-20	38.0776
ATF6B	-0.121667	2.71229	-10.5608	1.71e-21	5.19e-20	38.0744
TRPC6	0.163456	2.39632	10.5607	1.71e-21	5.19e-20	38.0737
B3GALT6	0.0904192	2.78286	10.5599	1.72e-21	5.21e-20	38.0681
ATP6V1C1	0.123986	2.98456	10.5584	1.73e-21	5.26e-20	38.0578
SCP2	-0.0687224	3.47166	-10.5518	1.82e-21	5.5e-20	38.0108
PCBP1-AS1	-0.0615672	2.47223	-10.5472	1.88e-21	5.68e-20	37.9784
SETMAR	-0.104648	2.47528	-10.5455	1.9e-21	5.74e-20	37.9662
KLF3-AS1	-0.177277	2.43064	-10.5436	1.93e-21	5.81e-20	37.9525
P4HA1	0.141705	2.74308	10.5351	2.05e-21	6.17e-20	37.8927
BLVRB	-0.125132	3.3424	-10.527	2.17e-21	6.53e-20	37.8351
CD200R1	-0.131059	2.36743	-10.5187	2.3e-21	6.91e-20	37.7768
DPY19L1	0.114504	2.44502	10.5162	2.35e-21	7.03e-20	37.7584
LRRC37A4P	-0.144366	2.88022	-10.5078	2.49e-21	7.45e-20	37.6996
CRIP1	-0.210136	3.41237	-10.5044	2.55e-21	7.63e-20	37.6753
CRYBG2	-0.15111	2.93071	-10.5006	2.62e-21	7.82e-20	37.6484
LOC401131	-0.133405	2.19697	-10.4971	2.69e-21	8.01e-20	37.6236
RNF170	-0.10974	2.84617	-10.4968	2.7e-21	8.01e-20	37.6214
ATP5F1A	-0.0625227	3.18627	-10.4967	2.7e-21	8.01e-20	37.6206
TCEAL2	-0.322355	2.24009	-10.4933	2.76e-21	8.2e-20	37.5968
RUNX2	0.115919	2.545	10.4929	2.77e-21	8.21e-20	37.5939
CEP55	0.280085	3.02088	10.4792	3.06e-21	9.04e-20	37.497
CD1C	-0.175058	2.8963	-10.4766	3.11e-21	9.2e-20	37.4787
EIF3F	-0.0681868	2.75722	-10.4645	3.4e-21	1e-19	37.3934
SOX12	0.106866	2.4545	10.4573	3.57e-21	1.05e-19	37.3426
MDH2	-0.0855031	3.25562	-10.4551	3.63e-21	1.07e-19	37.3273
GCNT3	-0.442991	2.85702	-10.4538	3.67e-21	1.08e-19	37.3176
IL17RC	-0.101915	2.86335	-10.4489	3.8e-21	1.11e-19	37.2832
APP	0.120496	3.3153	10.4418	3.99e-21	1.17e-19	37.2332
HENMT1	0.218745	3.01072	10.4413	4.01e-21	1.17e-19	37.2296
MMP19	0.164239	2.84358	10.4392	4.07e-21	1.19e-19	37.2144
HERC5	0.344571	2.96936	10.4381	4.1e-21	1.2e-19	37.2068
ATP13A3	0.167035	3.13901	10.4354	4.18e-21	1.22e-19	37.1881
RGS1	0.325864	2.95003	10.4339	4.22e-21	1.23e-19	37.1773
TRAV12-2	-0.0921669	2.35605	-10.4334	4.24e-21	1.23e-19	37.174
APOM	-0.100584	2.62177	-10.4334	4.24e-21	1.23e-19	37.1737
CCL3	0.393542	2.99371	10.4327	4.26e-21	1.23e-19	37.1689
GJC1	0.217888	2.57789	10.4193	4.69e-21	1.36e-19	37.0743
SLC2A1	0.275664	3.00049	10.4147	4.84e-21	1.4e-19	37.0422
TM7SF2	-0.305666	2.98417	-10.4144	4.86e-21	1.4e-19	37.0397
THBS2	0.287736	3.3207	10.4028	5.27e-21	1.52e-19	36.9581
ALS2CL	-0.18452	3.03106	-10.4013	5.33e-21	1.53e-19	36.9477
CYP2J2	-0.279572	2.75542	-10.4013	5.33e-21	1.53e-19	36.9473
FCER1A	-0.262579	2.60505	-10.3942	5.61e-21	1.61e-19	36.8976
FCGR1B	0.347669	2.78416	10.3868	5.91e-21	1.69e-19	36.8451
PPL	-0.277552	3.52959	-10.3847	6e-21	1.71e-19	36.8303
PRNP	0.133882	3.44993	10.3814	6.14e-21	1.75e-19	36.8073
B3GALT4	-0.0901418	2.61914	-10.379	6.25e-21	1.78e-19	36.7906
CLINT1	-0.122252	3.20229	-10.3741	6.47e-21	1.84e-19	36.7562
MYO5A	0.177329	2.63844	10.3733	6.51e-21	1.85e-19	36.75
KCNAB1	-0.086054	2.48119	-10.369	6.71e-21	1.9e-19	36.7203
IL17D	-0.2926	2.41794	-10.3651	6.9e-21	1.95e-19	36.6927
TXNDC12	0.074971	3.36616	10.3533	7.5e-21	2.12e-19	36.6093
TDO2	0.349359	2.4719	10.3502	7.67e-21	2.17e-19	36.5879
STRBP	-0.213309	2.86093	-10.3233	9.28e-21	2.62e-19	36.3988
FADS1	0.213192	2.9544	10.3228	9.32e-21	2.62e-19	36.3952
LRRC4C	-0.0655832	2.16263	-10.3227	9.32e-21	2.62e-19	36.3946
SIM2	-0.22719	2.6265	-10.3201	9.5e-21	2.67e-19	36.3758
RAET1E	-0.347972	2.82334	-10.3099	1.02e-20	2.87e-19	36.3047
PPM1L	-0.195544	2.48579	-10.3057	1.05e-20	2.95e-19	36.2752
PROCR	0.244644	3.00396	10.3056	1.05e-20	2.95e-19	36.2744
TRIM13	-0.153449	2.98016	-10.3022	1.08e-20	3.02e-19	36.2502
THBS1	0.293636	2.83251	10.2971	1.12e-20	3.12e-19	36.2145
TSPAN3	-0.0902051	2.84852	-10.293	1.15e-20	3.21e-19	36.186
PRSS2	-0.239014	2.87045	-10.293	1.15e-20	3.21e-19	36.1858
CALB2	-0.283578	2.76432	-10.2916	1.16e-20	3.23e-19	36.1761
HOXD10	0.301074	2.60191	10.2901	1.18e-20	3.26e-19	36.1653
CRYBG1	-0.140921	3.42037	-10.2873	1.2e-20	3.32e-19	36.1459
CXCL16	0.160113	3.07809	10.2785	1.28e-20	3.54e-19	36.0839
LGI1	-0.144758	2.09842	-10.2634	1.42e-20	3.93e-19	35.9782
STK39	-0.208198	3.14141	-10.2614	1.44e-20	3.98e-19	35.9643
CCDC12	-0.0770923	3.23213	-10.2606	1.45e-20	4e-19	35.9585
IFITM2	0.119625	3.55858	10.2595	1.46e-20	4.02e-19	35.9509
C1orf116	-0.285842	3.13094	-10.2592	1.46e-20	4.03e-19	35.9484
SLC25A3	-0.0679077	3.29056	-10.2542	1.52e-20	4.17e-19	35.9134
CYSRT1	-0.418128	3.18446	-10.2486	1.58e-20	4.33e-19	35.8741
ADGRE2	0.22259	2.48636	10.2479	1.59e-20	4.34e-19	35.8696
COL6A1	0.161496	2.80059	10.2444	1.63e-20	4.45e-19	35.8451
CLOCK	-0.0946862	2.99305	-10.2365	1.72e-20	4.7e-19	35.7892
FBXO34	-0.0850031	2.83104	-10.236	1.72e-20	4.71e-19	35.7863
ABCD3	-0.137118	3.11027	-10.2322	1.77e-20	4.83e-19	35.7597
CAVIN2	-0.285242	2.59197	-10.2267	1.84e-20	5.01e-19	35.7209
YWHAH	0.0986149	2.64924	10.2265	1.85e-20	5.01e-19	35.7194
CYP3A4	-0.0566197	2.57374	-10.2265	1.85e-20	5.01e-19	35.7193
HSD17B6	0.270543	2.35538	10.2227	1.9e-20	5.14e-19	35.6928
USP46	-0.124505	2.7613	-10.2224	1.9e-20	5.14e-19	35.6909
SLAMF8	0.263812	2.79798	10.2172	1.97e-20	5.33e-19	35.6545
TREM2	0.19656	2.94233	10.2107	2.06e-20	5.57e-19	35.609
LRBA	-0.130402	3.16298	-10.2084	2.1e-20	5.66e-19	35.5929
LINC01094	0.27624	2.55274	10.2005	2.22e-20	5.97e-19	35.5376
EPB41L3	-0.274221	2.97825	-10.1988	2.25e-20	6.04e-19	35.5257
GPR68	0.168556	2.75166	10.1966	2.28e-20	6.12e-19	35.5104
DOP1B	-0.14849	2.52205	-10.1947	2.31e-20	6.2e-19	35.497
ACAT1	-0.0952346	2.63744	-10.1929	2.34e-20	6.27e-19	35.4844
CPNE3	-0.0957598	3.45003	-10.1894	2.4e-20	6.42e-19	35.4597
RAB11FIP1	-0.174598	3.19175	-10.1867	2.45e-20	6.54e-19	35.4406
NEBL	-0.220548	2.78059	-10.1841	2.49e-20	6.65e-19	35.4229
SCEL	-0.461461	2.95478	-10.183	2.51e-20	6.69e-19	35.4153
TRAK1	-0.100011	3.02285	-10.1822	2.52e-20	6.72e-19	35.4097
PDGFRB	0.174043	3.18852	10.1802	2.56e-20	6.81e-19	35.3954
ALDH3A2	-0.166849	3.28981	-10.1793	2.58e-20	6.84e-19	35.3892
HTRA1	0.227428	3.29499	10.1741	2.67e-20	7.09e-19	35.3529
KNSTRN	0.168215	3.01203	10.1737	2.68e-20	7.1e-19	35.3502
CEMIP2	0.209575	2.89441	10.1672	2.81e-20	7.43e-19	35.3045
CLEC7A	0.219906	2.68043	10.1639	2.87e-20	7.59e-19	35.2813
MEIS1	-0.273821	2.95324	-10.1625	2.9e-20	7.66e-19	35.2719
SFXN3	0.120003	2.88512	10.1601	2.95e-20	7.78e-19	35.2553
TWSG1	0.143529	3.11458	10.1577	3e-20	7.9e-19	35.2382
PIK3C2B	-0.139037	3.22182	-10.1573	3.01e-20	7.91e-19	35.2355
MFSD5	-0.110754	3.1805	-10.1563	3.03e-20	7.96e-19	35.2282
UCK2	0.124232	3.12395	10.1528	3.11e-20	8.14e-19	35.2043
MMRN1	-0.395472	2.47025	-10.1508	3.15e-20	8.25e-19	35.1897
TOR1A	0.0674619	2.86911	10.1506	3.16e-20	8.25e-19	35.1888
P3H1	0.175547	3.03612	10.1468	3.24e-20	8.46e-19	35.1618
KIF1C	-0.107605	2.7596	-10.1467	3.24e-20	8.46e-19	35.1616
BRK1	-0.0720495	3.16872	-10.1446	3.29e-20	8.58e-19	35.1466
LTA4H	-0.0998749	3.46212	-10.1444	3.3e-20	8.58e-19	35.1454
HOXC9	0.265359	2.48955	10.1439	3.31e-20	8.6e-19	35.1415
ASCC2	-0.122281	3.07714	-10.1402	3.4e-20	8.81e-19	35.1163
LINC00951	-0.0891411	2.62319	-10.1316	3.61e-20	9.36e-19	35.0561
TMPRSS11B	-0.843731	3.09965	-10.1283	3.7e-20	9.57e-19	35.0329
AGRN	0.0936674	2.93279	10.126	3.76e-20	9.71e-19	35.0172
KLHDC7A	-0.0802687	2.45514	-10.1248	3.79e-20	9.78e-19	35.0082
RRAGD	-0.29105	3.00056	-10.1242	3.8e-20	9.81e-19	35.0046
GNS	0.102368	3.14843	10.1238	3.81e-20	9.82e-19	35.0016
HLA-J	0.112814	3.50241	10.122	3.87e-20	9.94e-19	34.9887
PTRHD1	-0.0751206	3.30651	-10.1163	4.02e-20	1.03e-18	34.9495
TTYH3	0.130389	3.051	10.1153	4.05e-20	1.04e-18	34.942
TMEM109	-0.0847353	3.23967	-10.1126	4.13e-20	1.06e-18	34.9236
TYRO3	-0.128799	2.74911	-10.1082	4.26e-20	1.09e-18	34.8926
ITSN2	-0.0983006	2.86918	-10.1004	4.5e-20	1.15e-18	34.8383
WWC1	-0.138352	2.69919	-10.0944	4.7e-20	1.2e-18	34.7963
AHR	0.121269	3.43353	10.0938	4.71e-20	1.2e-18	34.7925
CRIP2	-0.194435	3.1822	-10.093	4.74e-20	1.21e-18	34.7866
GBP6	-0.462759	3.19133	-10.0919	4.78e-20	1.22e-18	34.7789
CHST3	0.112228	2.83303	10.0892	4.87e-20	1.24e-18	34.7602
TRMT112	0.0687301	3.5739	10.0853	5e-20	1.27e-18	34.7333
ZNF555	-0.07214	2.40588	-10.0815	5.14e-20	1.3e-18	34.7069
PLXNA2	-0.120436	2.9284	-10.0758	5.35e-20	1.35e-18	34.6669
RAP1B	0.0720145	3.61511	10.0756	5.36e-20	1.35e-18	34.6658
CHST15	0.113643	2.90852	10.0738	5.43e-20	1.37e-18	34.6531
ARL1	-0.0820061	3.19863	-10.0647	5.79e-20	1.46e-18	34.5898
MARCKSL1	0.235108	3.28639	10.0594	6.01e-20	1.51e-18	34.5527
ERRFI1	0.187984	3.25124	10.0594	6.01e-20	1.51e-18	34.5524
CTSK	0.204777	3.3745	10.0519	6.33e-20	1.59e-18	34.5003
RAB5B	-0.0892584	3.23769	-10.0467	6.57e-20	1.65e-18	34.4647
PGM5-AS1	-0.134502	2.56664	-10.046	6.6e-20	1.65e-18	34.4591
KSR1	-0.064431	2.69079	-10.0455	6.62e-20	1.66e-18	34.4563
CLCA4	-0.661388	3.08686	-10.039	6.93e-20	1.73e-18	34.4109
CCL4	0.277479	3.10774	10.0384	6.96e-20	1.74e-18	34.4067
TECR	-0.13087	3.03776	-10.0338	7.19e-20	1.79e-18	34.3749
GNPDA1	0.0740772	3.10775	10.0313	7.32e-20	1.82e-18	34.357
FBXL16	-0.146607	2.67059	-10.0303	7.37e-20	1.83e-18	34.3506
KIAA0556	-0.0839098	2.98821	-10.0298	7.4e-20	1.84e-18	34.3465
PRRT3	-0.130425	2.59575	-10.0219	7.82e-20	1.94e-18	34.2917
ENSA	-0.0992924	3.15477	-10.0197	7.94e-20	1.97e-18	34.2767
MYO10	0.174973	2.69655	10.0188	7.99e-20	1.98e-18	34.2704
GAS7	-0.18822	2.90616	-10.0178	8.05e-20	1.99e-18	34.2636
ATP5MG	-0.066362	3.52752	-10.0154	8.19e-20	2.02e-18	34.2468
LGALS3	-0.124614	3.33735	-10.0126	8.35e-20	2.06e-18	34.2269
FOXM1	0.201195	2.93651	10.0025	8.97e-20	2.21e-18	34.1568
TOM1	-0.122768	3.02813	-10.0007	9.08e-20	2.23e-18	34.1446
HMGB3	0.159195	3.07296	9.99909	9.18e-20	2.26e-18	34.1334
BMP1	0.0967634	2.80194	9.99676	9.33e-20	2.29e-18	34.1173
RSAD2	0.480677	3.00409	9.991	9.72e-20	2.38e-18	34.0773
BMP2	0.320366	2.94175	9.9823	1.03e-19	2.53e-18	34.0168
CCDC9B	-0.207922	2.89652	-9.98079	1.04e-19	2.55e-18	34.0064
GSKIP	-0.0995013	3.39582	-9.97854	1.06e-19	2.59e-18	33.9908
SLC6A1	-0.237692	2.2114	-9.97854	1.06e-19	2.59e-18	33.9907
ANTXR1	0.0992555	2.76604	9.96914	1.13e-19	2.76e-18	33.9256
BCOR	-0.143629	2.79096	-9.96588	1.16e-19	2.82e-18	33.9029
AKR1A1	-0.0894981	3.42537	-9.96575	1.16e-19	2.82e-18	33.902
HS3ST1	-0.177547	2.6938	-9.96522	1.16e-19	2.83e-18	33.8983
XAF1	0.238065	3.17717	9.96399	1.17e-19	2.85e-18	33.8899
SERPINB1	-0.190328	3.34741	-9.96357	1.18e-19	2.86e-18	33.887
RNF217	0.183809	2.72294	9.95838	1.22e-19	2.96e-18	33.8509
ZNF185	-0.238779	3.40855	-9.95596	1.24e-19	3e-18	33.8341
RGMA	-0.128589	2.76635	-9.94498	1.34e-19	3.24e-18	33.758
BGN	0.235668	3.08223	9.93922	1.4e-19	3.37e-18	33.7181
NHP2	-0.0658336	3.5222	-9.93388	1.45e-19	3.5e-18	33.6811
GGTA1P	-0.262393	2.97286	-9.93257	1.46e-19	3.52e-18	33.6721
KIF4A	0.212203	2.97152	9.92658	1.53e-19	3.67e-18	33.6306
CTSL	0.159434	3.36815	9.91856	1.62e-19	3.88e-18	33.575
SLC5A3	0.112669	2.86939	9.91776	1.62e-19	3.9e-18	33.5695
ZNF790-AS1	-0.0998488	2.40178	-9.91597	1.65e-19	3.94e-18	33.5571
DSE	0.0843452	2.6612	9.91423	1.67e-19	3.98e-18	33.5451
RSRC1	0.140498	2.50409	9.91154	1.7e-19	4.05e-18	33.5264
HACD3	0.0976084	3.35183	9.9096	1.72e-19	4.11e-18	33.513
GNE	-0.246115	2.96807	-9.90422	1.79e-19	4.26e-18	33.4759
MAB21L3	-0.39043	2.42133	-9.90184	1.82e-19	4.32e-18	33.4594
DLX5	0.289551	2.65968	9.90061	1.83e-19	4.36e-18	33.4509
KLHL42	0.128286	2.93989	9.89648	1.89e-19	4.48e-18	33.4223
ZC3H6	-0.120346	2.60054	-9.89247	1.94e-19	4.6e-18	33.3946
POLR2I	-0.0762001	3.29895	-9.89202	1.95e-19	4.61e-18	33.3915
ZMIZ1	-0.0698847	2.92633	-9.88298	2.07e-19	4.91e-18	33.3289
TNFAIP1	0.107173	3.16427	9.88238	2.08e-19	4.92e-18	33.3248
TENM2	0.450966	3.10653	9.87995	2.12e-19	5e-18	33.308
UGT1A10	-0.411971	2.92752	-9.87882	2.13e-19	5.03e-18	33.3002
CES2	-0.191691	3.27188	-9.87359	2.21e-19	5.22e-18	33.2641
IL36G	0.478081	3.12444	9.87343	2.22e-19	5.22e-18	33.2629
CDK2AP1	0.0742213	3.57781	9.87234	2.23e-19	5.25e-18	33.2554
SMAP1	-0.0919939	3.34364	-9.86482	2.35e-19	5.53e-18	33.2035
SLC44A1	0.115263	3.04314	9.86438	2.36e-19	5.54e-18	33.2004
GPR161	0.128693	2.75171	9.85766	2.47e-19	5.8e-18	33.154
TICAM1	-0.148259	2.89641	-9.85597	2.5e-19	5.86e-18	33.1424
DLG3	-0.12844	2.84589	-9.85539	2.51e-19	5.88e-18	33.1384
RNPS1	0.0609233	3.32494	9.85059	2.6e-19	6.07e-18	33.1052
TTC22	-0.173685	2.69452	-9.84667	2.67e-19	6.23e-18	33.0781
BCL2A1	0.477197	2.90193	9.8365	2.87e-19	6.68e-18	33.0079
MALL	-0.21056	3.44194	-9.83398	2.92e-19	6.79e-18	32.9905
CPXM1	0.282211	2.74589	9.83034	2.99e-19	6.96e-18	32.9654
PPP1R1B	-0.245189	2.64526	-9.82958	3.01e-19	6.99e-18	32.9602
PSMB5	0.0829276	3.40425	9.82736	3.06e-19	7.09e-18	32.9449
SLC38A6	0.23307	2.77824	9.82392	3.13e-19	7.25e-18	32.9211
EPB41L4A-AS1	-0.109078	2.88723	-9.82166	3.18e-19	7.36e-18	32.9056
LRP12	0.302938	2.64176	9.82082	3.2e-19	7.4e-18	32.8998
PHACTR2	-0.136738	3.1082	-9.81997	3.22e-19	7.43e-18	32.8939
MMP2	0.119568	2.74618	9.81967	3.23e-19	7.44e-18	32.8919
ZNFX1	0.105319	3.20628	9.81898	3.24e-19	7.47e-18	32.8871
GOT1	-0.139951	3.18714	-9.81348	3.37e-19	7.75e-18	32.8492
H2AFJ	-0.106266	3.01673	-9.80629	3.54e-19	8.14e-18	32.7997
CXCL9	0.475552	3.20717	9.80588	3.55e-19	8.15e-18	32.7968
NEU1	0.092419	3.14178	9.80028	3.69e-19	8.47e-18	32.7582
DUXAP10	0.422407	2.5489	9.79996	3.7e-19	8.48e-18	32.756
PPARG	-0.193021	2.49542	-9.79934	3.72e-19	8.51e-18	32.7518
PLP1	-0.348419	2.39102	-9.79254	3.9e-19	8.91e-18	32.7049
PSMB2	0.0643404	2.92961	9.78683	4.06e-19	9.26e-18	32.6656
FRMD4B	-0.0713868	2.71915	-9.78344	4.15e-19	9.47e-18	32.6422
DELE1	-0.0694168	2.74885	-9.78151	4.21e-19	9.59e-18	32.6289
SAMSN1	0.306028	2.79668	9.78115	4.22e-19	9.6e-18	32.6265
DUSP5	-0.205386	3.18556	-9.78029	4.24e-19	9.65e-18	32.6206
FCER1G	0.23249	3.12675	9.77658	4.36e-19	9.89e-18	32.595
MAP3K1	-0.145498	2.9349	-9.77444	4.42e-19	1e-17	32.5803
SOCS6	-0.169565	2.80446	-9.77376	4.44e-19	1.01e-17	32.5756
ITGA5	0.226349	3.12015	9.77228	4.49e-19	1.02e-17	32.5654
SELENBP1	-0.154786	2.65385	-9.77024	4.55e-19	1.03e-17	32.5514
RCC2	0.0770632	3.41589	9.76771	4.63e-19	1.05e-17	32.534
FBXO45	0.167139	2.99294	9.76689	4.66e-19	1.05e-17	32.5284
ADAM17	0.10144	3.07816	9.76437	4.74e-19	1.07e-17	32.511
PHYHIP	-0.102168	2.47794	-9.76432	4.74e-19	1.07e-17	32.5107
FAM172A	-0.141932	2.93171	-9.75951	4.91e-19	1.1e-17	32.4776
REN	-0.111231	2.45113	-9.75931	4.91e-19	1.1e-17	32.4762
COL4A3BP	-0.0832022	3.17106	-9.75899	4.92e-19	1.1e-17	32.474
CRYZL2P	-0.137393	2.37501	-9.75425	5.09e-19	1.14e-17	32.4414
PRSS3P2	-0.168759	3.03829	-9.75313	5.13e-19	1.15e-17	32.4337
PDE12	-0.0737435	2.63901	-9.75218	5.16e-19	1.15e-17	32.4272
SH3YL1	-0.0827883	2.80736	-9.74881	5.28e-19	1.18e-17	32.404
FTL	0.0899186	3.772	9.74828	5.3e-19	1.18e-17	32.4004
UPK1A	-0.377378	2.56635	-9.73611	5.77e-19	1.29e-17	32.3167
PARP9	0.16615	3.11482	9.7349	5.82e-19	1.3e-17	32.3084
SDHD	-0.0726514	3.00528	-9.7348	5.83e-19	1.3e-17	32.3077
PGD	-0.100897	2.85194	-9.73054	6e-19	1.33e-17	32.2785
ATP6V0B	0.0727658	3.43075	9.72904	6.06e-19	1.35e-17	32.2681
TPPP	-0.150656	2.59263	-9.7271	6.15e-19	1.36e-17	32.2548
MRGBP	0.147515	2.83912	9.72476	6.25e-19	1.38e-17	32.2388
IGF2BP2	0.17088	2.84791	9.72147	6.39e-19	1.41e-17	32.2161
IL15RA	0.137815	3.04069	9.72016	6.45e-19	1.43e-17	32.2072
CYSLTR1	-0.220761	2.4977	-9.71782	6.56e-19	1.45e-17	32.1911
OGFRL1	-0.184462	3.04398	-9.71502	6.68e-19	1.47e-17	32.1719
IL10RB-DT	-0.0948267	2.33132	-9.71026	6.91e-19	1.52e-17	32.1392
SCNN1B	-0.314941	2.79813	-9.7025	7.29e-19	1.6e-17	32.086
RNF141	-0.0964168	2.79677	-9.70075	7.38e-19	1.62e-17	32.0739
AEBP1	0.212354	3.34546	9.70022	7.41e-19	1.63e-17	32.0703
EIF2B4	-0.0701797	3.25069	-9.69541	7.66e-19	1.68e-17	32.0373
S100A16	-0.101016	3.69928	-9.6949	7.69e-19	1.68e-17	32.0338
NUP62	0.0867402	2.80415	9.69034	7.93e-19	1.74e-17	32.0026
CFD	-0.313827	3.12618	-9.68844	8.04e-19	1.76e-17	31.9896
CMPK1	-0.0540262	3.13046	-9.68764	8.08e-19	1.77e-17	31.984
UBE2C	0.156189	3.28747	9.68664	8.14e-19	1.78e-17	31.9772
SOCS1	0.125778	2.62444	9.68481	8.25e-19	1.8e-17	31.9647
SLC25A32	0.150714	3.15817	9.68168	8.43e-19	1.83e-17	31.9432
GULP1	-0.244584	2.63502	-9.67967	8.54e-19	1.86e-17	31.9294
RPS8	-0.0394581	3.16456	-9.67736	8.68e-19	1.89e-17	31.9135
ADORA2B	0.221165	3.08034	9.67693	8.71e-19	1.89e-17	31.9107
HLA-G	0.0939181	3.55645	9.67689	8.71e-19	1.89e-17	31.9104
ABRAXAS1	-0.124361	2.61872	-9.67525	8.81e-19	1.91e-17	31.8991
GNB5	0.099613	2.78331	9.67017	9.13e-19	1.97e-17	31.8643
MTIF3	-0.0739163	2.67175	-9.66965	9.16e-19	1.98e-17	31.8607
LTBP1	0.217625	3.19504	9.66578	9.41e-19	2.03e-17	31.8342
CLDN8	-0.399733	2.40148	-9.66318	9.58e-19	2.07e-17	31.8164
ZDHHC3	-0.0893224	2.88016	-9.65736	9.97e-19	2.15e-17	31.7765
GYS2	-0.277	2.09861	-9.65155	1.04e-18	2.23e-17	31.7367
STC2	0.194338	2.64325	9.65001	1.05e-18	2.26e-17	31.7262
CLDN7	-0.260246	3.22083	-9.64907	1.06e-18	2.27e-17	31.7198
PLAC9	-0.181852	2.78462	-9.64895	1.06e-18	2.27e-17	31.7189
LRRK2	-0.237044	2.63617	-9.64779	1.07e-18	2.28e-17	31.7111
HOXC13	0.202284	2.49434	9.64635	1.08e-18	2.3e-17	31.7012
CPT2	-0.0914616	2.91398	-9.63831	1.14e-18	2.43e-17	31.6462
ZHX1	-0.152197	3.02559	-9.63805	1.14e-18	2.44e-17	31.6444
ABCA5	-0.167278	2.81332	-9.63439	1.17e-18	2.5e-17	31.6193
ARHGAP10	-0.0988206	2.94927	-9.63325	1.18e-18	2.51e-17	31.6115
IDNK	-0.139199	2.80416	-9.63313	1.18e-18	2.51e-17	31.6107
SPINT1-AS1	-0.144474	2.9494	-9.62749	1.23e-18	2.61e-17	31.5721
TSHZ3	0.202335	2.88542	9.62489	1.25e-18	2.65e-17	31.5543
ECHS1	-0.0722416	3.42677	-9.61991	1.29e-18	2.74e-17	31.5203
STX19	-0.284554	2.5334	-9.61085	1.38e-18	2.92e-17	31.4584
KRT4	-0.532464	3.05627	-9.60693	1.41e-18	2.99e-17	31.4316
HIP1	0.119571	2.56562	9.6069	1.41e-18	2.99e-17	31.4314
ULK3	-0.147111	3.10298	-9.60324	1.45e-18	3.07e-17	31.4064
PAPPA	0.178745	2.62148	9.60044	1.48e-18	3.12e-17	31.3873
DHRS12	-0.0603859	2.63485	-9.59936	1.49e-18	3.14e-17	31.3799
TNFRSF11A	-0.216354	2.51365	-9.59895	1.49e-18	3.15e-17	31.3771
CCR8	0.12152	2.44455	9.59197	1.57e-18	3.3e-17	31.3294
ZNF780A	-0.127555	2.32678	-9.59038	1.59e-18	3.34e-17	31.3186
DEPTOR	-0.220366	2.55741	-9.58992	1.59e-18	3.34e-17	31.3154
PLEKHM1	-0.0962959	2.81961	-9.58814	1.61e-18	3.38e-17	31.3033
SPRED1	0.135699	2.79034	9.5877	1.62e-18	3.39e-17	31.3002
PILRA	0.157326	2.64541	9.58644	1.63e-18	3.41e-17	31.2917
HSBP1L1	-0.134151	3.02762	-9.5861	1.63e-18	3.42e-17	31.2893
LOC100506990	-0.195426	2.90271	-9.5702	1.82e-18	3.81e-17	31.1808
EYA2	-0.338012	2.81199	-9.56781	1.85e-18	3.87e-17	31.1645
NDUFA11	-0.0581763	3.23503	-9.5671	1.86e-18	3.89e-17	31.1597
ANKRD20A1	-0.104385	2.42505	-9.56284	1.92e-18	3.99e-17	31.1306
LDHA	0.059611	3.78368	9.56281	1.92e-18	3.99e-17	31.1304
ZNF281	0.170358	3.01435	9.56166	1.93e-18	4.02e-17	31.1226
LY6E	0.185911	3.29399	9.56112	1.94e-18	4.03e-17	31.1189
FAXDC2	-0.0965427	2.9956	-9.55841	1.98e-18	4.11e-17	31.1004
CDC6	0.26014	2.66972	9.5518	2.07e-18	4.29e-17	31.0553
SH2D1B	-0.132411	2.22913	-9.55129	2.08e-18	4.3e-17	31.0519
NID1	0.184026	2.86707	9.54626	2.15e-18	4.45e-17	31.0176
IFIT3	0.297947	3.23642	9.54454	2.18e-18	4.5e-17	31.0058
MAD2L2	0.113006	3.09272	9.54134	2.23e-18	4.6e-17	30.984
CRB3	-0.107732	3.07927	-9.5377	2.28e-18	4.71e-17	30.9592
COBLL1	-0.141069	2.64438	-9.53659	2.3e-18	4.74e-17	30.9517
WDR53	0.143597	2.93176	9.52804	2.44e-18	5.02e-17	30.8935
EPHB2	0.135688	2.78075	9.52795	2.44e-18	5.02e-17	30.8928
S100A14	-0.192026	3.53047	-9.52261	2.53e-18	5.2e-17	30.8565
XPA	-0.135933	3.01642	-9.52001	2.58e-18	5.29e-17	30.8388
UNK	-0.0689879	2.89372	-9.51897	2.6e-18	5.32e-17	30.8317
ARHGAP32	-0.215347	2.8043	-9.5186	2.6e-18	5.33e-17	30.8292
CXCL13	0.687375	3.09805	9.51609	2.65e-18	5.42e-17	30.8122
OASL	0.297096	2.97524	9.5135	2.7e-18	5.51e-17	30.7945
ARTN	0.220156	2.69382	9.50966	2.77e-18	5.65e-17	30.7684
PRMT2	-0.0738918	2.85452	-9.50504	2.86e-18	5.83e-17	30.737
ID3	0.137826	3.24163	9.49787	3e-18	6.12e-17	30.6882
CCDC110	-0.118016	2.14574	-9.4978	3e-18	6.12e-17	30.6878
SHOX2	0.204837	2.64533	9.49545	3.05e-18	6.21e-17	30.6718
C3AR1	0.179989	3.1445	9.49392	3.09e-18	6.27e-17	30.6614
BBIP1	-0.0734761	2.77167	-9.49073	3.15e-18	6.4e-17	30.6397
HOPX	-0.259351	3.03634	-9.48927	3.19e-18	6.46e-17	30.6297
ST6GALNAC1	-0.460035	2.88196	-9.48872	3.2e-18	6.47e-17	30.626
UBE2Z	0.0730287	3.25332	9.48867	3.2e-18	6.47e-17	30.6257
CMPK2	0.369005	3.13593	9.48867	3.2e-18	6.47e-17	30.6256
CCM2	0.114507	3.10951	9.48483	3.28e-18	6.64e-17	30.5995
BNIPL	-0.37077	2.84036	-9.48369	3.31e-18	6.68e-17	30.5918
CLDN10	-0.382695	2.55537	-9.47877	3.42e-18	6.91e-17	30.5584
FZD2	0.142255	2.72696	9.47524	3.51e-18	7.07e-17	30.5344
RAI14	0.220138	3.19272	9.47108	3.61e-18	7.27e-17	30.5062
ACP6	-0.126137	2.59315	-9.46924	3.66e-18	7.35e-17	30.4937
TMEM254	-0.164324	2.92729	-9.46612	3.74e-18	7.5e-17	30.4724
MIF4GD	-0.103115	3.0197	-9.46473	3.77e-18	7.57e-17	30.4631
CAPN7	-0.111657	3.03104	-9.4608	3.87e-18	7.77e-17	30.4364
PPDPF	-0.119082	3.1651	-9.45835	3.94e-18	7.89e-17	30.4197
ERF	0.0973087	2.82109	9.45782	3.95e-18	7.91e-17	30.4162
CYP27B1	0.3172	2.62931	9.44789	4.23e-18	8.46e-17	30.3487
CLDN23	-0.163258	2.27062	-9.44719	4.25e-18	8.5e-17	30.344
RELCH	-0.15648	3.14084	-9.44671	4.27e-18	8.52e-17	30.3407
CHSY3	0.248374	2.5734	9.44269	4.39e-18	8.75e-17	30.3135
STRN	-0.111772	2.84461	-9.4396	4.48e-18	8.93e-17	30.2925
C1GALT1	-0.141572	2.89315	-9.43593	4.6e-18	9.14e-17	30.2676
EGFL8	-0.109068	2.98303	-9.43564	4.61e-18	9.15e-17	30.2656
IL7R	0.304714	3.27122	9.43318	4.68e-18	9.3e-17	30.249
PLEK2	0.216809	3.26819	9.42991	4.79e-18	9.5e-17	30.2268
PTN	-0.32995	2.87236	-9.41403	5.34e-18	1.06e-16	30.1192
IGFBP3	0.202585	3.37769	9.41135	5.44e-18	1.08e-16	30.1011
YEATS2	0.126619	2.96191	9.41076	5.46e-18	1.08e-16	30.0971
CRNN	-0.696827	3.28873	-9.41067	5.47e-18	1.08e-16	30.0965
SDF4	0.0638313	3.23668	9.40981	5.5e-18	1.09e-16	30.0906
TEAD2	0.0974361	2.73725	9.40969	5.5e-18	1.09e-16	30.0898
SIRT7	-0.0996849	3.18848	-9.40544	5.67e-18	1.12e-16	30.061
COL4A6	0.27072	2.47194	9.4036	5.74e-18	1.13e-16	30.0486
LINC00938	-0.108855	2.62616	-9.40307	5.76e-18	1.13e-16	30.045
TGFBR3	-0.302177	3.01106	-9.40069	5.85e-18	1.15e-16	30.0289
CASP7	0.115173	3.17569	9.40051	5.86e-18	1.15e-16	30.0277
CBLB	0.126582	2.77977	9.38714	6.42e-18	1.26e-16	29.9372
SLC20A1	0.160029	3.21975	9.38259	6.63e-18	1.3e-16	29.9064
EXO1	0.176073	2.81914	9.37835	6.82e-18	1.34e-16	29.8777
MCAM	0.122836	2.98003	9.37509	6.98e-18	1.36e-16	29.8557
UHRF1	0.194399	3.19858	9.36984	7.23e-18	1.41e-16	29.8202
CALCOCO2	-0.0672405	2.88012	-9.36957	7.25e-18	1.41e-16	29.8184
DTX3L	0.118502	3.36622	9.36774	7.34e-18	1.43e-16	29.806
BEX4	-0.284727	2.96738	-9.36189	7.64e-18	1.49e-16	29.7665
RETSAT	-0.0976865	3.1333	-9.35577	7.96e-18	1.55e-16	29.7251
ALDH6A1	-0.172496	2.72705	-9.35568	7.97e-18	1.55e-16	29.7245
SYTL1	-0.169622	3.28002	-9.35498	8.01e-18	1.56e-16	29.7198
COX8A	-0.0557659	3.62748	-9.35363	8.08e-18	1.57e-16	29.7107
ACTN1	0.12933	3.24276	9.35141	8.2e-18	1.59e-16	29.6957
CCNG1	-0.0990481	3.35992	-9.3495	8.31e-18	1.61e-16	29.6828
CYP4F12	-0.169576	2.91051	-9.34931	8.32e-18	1.61e-16	29.6815
GNB4	0.138822	3.0925	9.34922	8.33e-18	1.61e-16	29.6809
TCP11L1	0.128899	2.56986	9.34198	8.75e-18	1.69e-16	29.632
TGFBR1	0.126443	2.9806	9.34029	8.85e-18	1.71e-16	29.6206
DENND4C	-0.121391	2.87476	-9.34006	8.87e-18	1.71e-16	29.6191
KCNRG	-0.0731047	2.26455	-9.33865	8.95e-18	1.72e-16	29.6095
BLNK	-0.288592	3.23011	-9.33793	9e-18	1.73e-16	29.6047
IGFBP7	0.111868	3.12028	9.33762	9.02e-18	1.73e-16	29.6026
LAMP3	0.280455	3.19776	9.33478	9.19e-18	1.77e-16	29.5834
C11orf54	-0.105766	2.87811	-9.33156	9.4e-18	1.8e-16	29.5617
CMAS	-0.0873282	2.98959	-9.32971	9.52e-18	1.82e-16	29.5492
MANSC1	-0.292595	3.16597	-9.32567	9.78e-18	1.87e-16	29.5219
DOCK8-AS1	-0.0697013	2.21056	-9.32302	9.96e-18	1.91e-16	29.5041
GLIDR	-0.137803	2.87778	-9.32115	1.01e-17	1.93e-16	29.4915
SCAMP2	-0.0745794	3.16899	-9.31814	1.03e-17	1.97e-16	29.4712
TPRG1	-0.257482	2.75028	-9.31465	1.05e-17	2.01e-16	29.4477
RAF1	-0.0788536	3.09175	-9.31294	1.07e-17	2.03e-16	29.4361
PAK2	0.116894	2.91991	9.3038	1.14e-17	2.16e-16	29.3745
ALG1	0.0871935	2.80738	9.30097	1.16e-17	2.2e-16	29.3554
SVIP	-0.290844	2.62465	-9.29923	1.17e-17	2.23e-16	29.3437
CYP2E1	-0.352465	2.7404	-9.29183	1.23e-17	2.34e-16	29.2939
SRM	0.103437	3.16481	9.29089	1.24e-17	2.35e-16	29.2875
RPS6KA1	0.13047	2.95026	9.28942	1.25e-17	2.38e-16	29.2777
MAGED4B	0.236664	2.81038	9.28854	1.26e-17	2.39e-16	29.2717
PCDH17	0.218065	2.71928	9.2852	1.29e-17	2.44e-16	29.2493
HSPH1	0.148989	3.15762	9.28511	1.29e-17	2.44e-16	29.2487
PET100	-0.0687594	3.36287	-9.28187	1.32e-17	2.49e-16	29.2268
PRPSAP1	-0.092523	3.09319	-9.28104	1.33e-17	2.5e-16	29.2212
NCOA2	-0.114683	2.90007	-9.28031	1.33e-17	2.51e-16	29.2163
AK9	-0.086815	2.35967	-9.27903	1.35e-17	2.53e-16	29.2077
SHISA3	-0.0797285	1.97482	-9.27669	1.37e-17	2.57e-16	29.192
ATP5ME	-0.0675237	3.49744	-9.2755	1.38e-17	2.59e-16	29.184
VSIG10L	-0.435191	3.09734	-9.27296	1.4e-17	2.63e-16	29.1669
ALDH1A2	-0.0912467	2.51551	-9.27112	1.42e-17	2.66e-16	29.1545
SCG5	0.43628	2.55995	9.26973	1.43e-17	2.69e-16	29.1451
SPRY4-IT1	0.15858	2.76941	9.26677	1.46e-17	2.74e-16	29.1252
MIPEPP3	-0.116501	2.61095	-9.26621	1.47e-17	2.75e-16	29.1214
PRDX5	-0.0810169	3.53797	-9.26611	1.47e-17	2.75e-16	29.1207
RPL29	-0.0431254	3.76241	-9.265	1.48e-17	2.76e-16	29.1133
PPP1R18	0.131608	3.19766	9.26342	1.5e-17	2.79e-16	29.1027
SLC39A13	0.116021	2.96976	9.24865	1.65e-17	3.08e-16	29.0034
CHCHD10	-0.150875	3.2653	-9.24674	1.68e-17	3.12e-16	28.9905
APPL1	-0.1414	2.98019	-9.24405	1.71e-17	3.18e-16	28.9725
MAPRE1	0.0746982	3.35405	9.24279	1.72e-17	3.2e-16	28.964
TRIM6	-0.230152	2.82691	-9.24257	1.72e-17	3.2e-16	28.9625
GTF2E1	0.095368	3.07058	9.24182	1.73e-17	3.22e-16	28.9575
ABCA9	-0.161102	2.28819	-9.24151	1.74e-17	3.22e-16	28.9554
HAVCR2	0.135185	2.7179	9.24123	1.74e-17	3.22e-16	28.9535
A2ML1	-0.391419	3.07464	-9.23929	1.76e-17	3.26e-16	28.9405
ACADL	-0.126391	2.17202	-9.23654	1.8e-17	3.32e-16	28.922
CCDC71L	0.124198	2.7045	9.23626	1.8e-17	3.33e-16	28.9202
PRKAB1	-0.0935402	2.94426	-9.23294	1.84e-17	3.4e-16	28.8979
LAMTOR3	-0.0998852	3.09514	-9.23227	1.85e-17	3.41e-16	28.8934
FGD6	0.17412	2.67994	9.22944	1.89e-17	3.47e-16	28.8744
SUN2	-0.074944	3.20833	-9.22449	1.95e-17	3.59e-16	28.8411
PRKRA-AS1	0.134052	2.48982	9.22442	1.95e-17	3.59e-16	28.8407
YTHDF1	0.0511889	3.32268	9.22168	1.99e-17	3.65e-16	28.8223
SOCS4	0.101408	2.69178	9.21682	2.05e-17	3.77e-16	28.7897
GALNT5	-0.193019	2.56115	-9.21563	2.07e-17	3.8e-16	28.7817
ICAM1	0.209333	2.95753	9.21451	2.09e-17	3.83e-16	28.7742
LIMA1	0.117745	3.08741	9.21379	2.1e-17	3.84e-16	28.7693
KIF14	0.234352	2.79517	9.21296	2.11e-17	3.86e-16	28.7637
TYRP1	-0.505719	2.29028	-9.21155	2.13e-17	3.89e-16	28.7543
GPR153	0.105732	3.05906	9.20821	2.18e-17	3.98e-16	28.7319
SUN1	-0.101274	2.73263	-9.20753	2.19e-17	3.99e-16	28.7273
ACSS2	-0.103283	3.04572	-9.20616	2.21e-17	4.02e-16	28.7181
FOXD1	0.265635	2.77537	9.20615	2.21e-17	4.02e-16	28.7181
OAS2	0.230296	2.9121	9.2042	2.24e-17	4.07e-16	28.705
LINC00330	-0.0907295	2.51159	-9.20072	2.29e-17	4.17e-16	28.6816
TXNRD1	0.116927	2.77067	9.20016	2.3e-17	4.18e-16	28.6779
HSD17B8	-0.111889	3.14617	-9.19922	2.32e-17	4.2e-16	28.6716
RBM8A	-0.0672569	3.09142	-9.19789	2.34e-17	4.24e-16	28.6627
ADA	0.182104	3.00568	9.19689	2.35e-17	4.26e-16	28.656
ITPRID2	0.17955	2.88014	9.19223	2.43e-17	4.4e-16	28.6248
HSPB8	-0.229002	3.14862	-9.19033	2.46e-17	4.45e-16	28.612
EMILIN2	0.100033	2.68055	9.188	2.5e-17	4.52e-16	28.5964
GAS8	-0.0801994	2.94966	-9.18668	2.52e-17	4.55e-16	28.5876
EMILIN1	0.267071	2.68755	9.18596	2.53e-17	4.57e-16	28.5827
KAZN	-0.106565	2.97954	-9.18073	2.63e-17	4.73e-16	28.5477
RUVBL1	0.124565	3.16804	9.1781	2.67e-17	4.81e-16	28.5301
SCARA3	-0.169699	2.69012	-9.17805	2.67e-17	4.81e-16	28.5298
STEAP1	0.197163	3.14325	9.17127	2.8e-17	5.03e-16	28.4843
MTFR1L	-0.0826097	3.03625	-9.17064	2.81e-17	5.05e-16	28.4801
RHCG	-0.436613	3.41633	-9.17033	2.82e-17	5.06e-16	28.4781
KIF9	-0.0913271	2.81757	-9.16978	2.83e-17	5.07e-16	28.4744
HPGD	-0.369061	2.92004	-9.16854	2.85e-17	5.11e-16	28.4661
ANKHD1-EIF4EBP3	-0.0744593	2.96703	-9.1679	2.86e-17	5.13e-16	28.4618
SUMO3	0.0669417	3.34906	9.16742	2.87e-17	5.14e-16	28.4586
STK40	-0.0806449	2.92582	-9.16529	2.92e-17	5.2e-16	28.4443
TMEM238L	-0.102844	2.63513	-9.16522	2.92e-17	5.2e-16	28.4439
SLC28A3	0.308225	2.80206	9.16517	2.92e-17	5.2e-16	28.4436
DOCK3	-0.118413	2.29921	-9.16433	2.93e-17	5.23e-16	28.4379
SLC3A2	0.112298	3.324	9.16187	2.98e-17	5.31e-16	28.4214
SF3B3	-0.0712863	3.09528	-9.15894	3.04e-17	5.41e-16	28.4019
NCBP2	0.0994255	3.16319	9.15547	3.12e-17	5.54e-16	28.3786
CHRDL1	-0.509673	2.78963	-9.1521	3.19e-17	5.66e-16	28.3561
RIOK3	-0.0683678	3.2208	-9.15041	3.22e-17	5.72e-16	28.3448
CXCR2	-0.320747	2.82395	-9.14657	3.31e-17	5.87e-16	28.3191
DNMT3B	0.19782	2.84026	9.13602	3.55e-17	6.3e-16	28.2486
ADH7	-0.515523	2.98498	-9.13466	3.59e-17	6.35e-16	28.2395
INO80D	-0.0640397	2.92238	-9.13392	3.61e-17	6.37e-16	28.2346
WWP2	-0.0565549	2.75314	-9.13382	3.61e-17	6.37e-16	28.2339
ZNF677	-0.12528	2.2426	-9.132	3.65e-17	6.45e-16	28.2217
CRISP2	-0.336698	2.15152	-9.12299	3.88e-17	6.85e-16	28.1615
VARS2	-0.0948169	3.21737	-9.1143	4.12e-17	7.26e-16	28.1035
MIPEP	-0.135732	2.87556	-9.11159	4.19e-17	7.38e-16	28.0854
CGN	-0.183986	2.72693	-9.11138	4.2e-17	7.39e-16	28.0841
APMAP	0.0779718	2.82673	9.11065	4.22e-17	7.42e-16	28.0791
SPRR2G	0.502706	3.28216	9.10976	4.25e-17	7.46e-16	28.0732
RBBP8	0.124799	3.32189	9.10886	4.27e-17	7.5e-16	28.0672
GOLGA8N	-0.0936931	3.34613	-9.10534	4.37e-17	7.67e-16	28.0437
GNL3	-0.069837	2.99146	-9.10529	4.38e-17	7.67e-16	28.0434
ASAP3	-0.151654	2.85665	-9.10221	4.47e-17	7.82e-16	28.0228
ACVR2A	-0.15922	2.90604	-9.10189	4.48e-17	7.83e-16	28.0207
CLGN	-0.381017	2.2379	-9.09852	4.58e-17	8e-16	27.9982
LIPH	-0.191652	2.56729	-9.09582	4.67e-17	8.15e-16	27.9802
COL11A1	0.564797	2.59341	9.09546	4.68e-17	8.16e-16	27.9778
GOLPH3L	-0.122998	3.24087	-9.09392	4.73e-17	8.24e-16	27.9676
BTG1	0.0972963	3.22165	9.09088	4.82e-17	8.4e-16	27.9473
MSRB1	0.131062	3.24208	9.08937	4.87e-17	8.48e-16	27.9372
SLC15A3	0.144962	3.09643	9.08839	4.91e-17	8.53e-16	27.9307
KIF26B	0.159844	2.50847	9.08581	4.99e-17	8.67e-16	27.9135
S100A7A	0.306009	2.76214	9.08523	5.01e-17	8.7e-16	27.9096
ZNF493	-0.143197	2.60574	-9.08176	5.13e-17	8.9e-16	27.8865
ZDHHC13	-0.157498	3.0526	-9.08151	5.14e-17	8.9e-16	27.8848
RPN1	0.0614287	2.94182	9.07868	5.24e-17	9.07e-16	27.866
FOXN2	0.10377	2.84335	9.07841	5.25e-17	9.08e-16	27.8642
TSG101	-0.0588018	3.35691	-9.07471	5.38e-17	9.3e-16	27.8395
ECT2	0.160925	2.74647	9.07368	5.42e-17	9.36e-16	27.8326
SRSF5	-0.0669041	3.28354	-9.06868	5.6e-17	9.67e-16	27.7993
USP54	-0.159993	3.08836	-9.06843	5.61e-17	9.68e-16	27.7977
DUSP28	-0.112259	2.91165	-9.0669	5.67e-17	9.77e-16	27.7875
EPHB4	0.0832216	3.05337	9.06538	5.73e-17	9.86e-16	27.7774
ZIC2	0.373126	2.37696	9.06453	5.76e-17	9.91e-16	27.7717
POLR2J2	-0.102315	2.96783	-9.06257	5.84e-17	1e-15	27.7587
TTPAL	0.142284	3.04516	9.06186	5.87e-17	1.01e-15	27.7539
GRAMD2B	-0.168279	2.81919	-9.06037	5.93e-17	1.02e-15	27.744
VKORC1	0.093663	3.29066	9.06035	5.93e-17	1.02e-15	27.7439
PRR15L	-0.220515	2.68342	-9.05967	5.96e-17	1.02e-15	27.7393
HSD17B4	-0.0654721	2.85718	-9.05638	6.09e-17	1.04e-15	27.7175
PEX11B	-0.0711115	3.16438	-9.05615	6.1e-17	1.04e-15	27.7159
FAM102A	-0.0846786	2.80991	-9.05479	6.15e-17	1.05e-15	27.7069
TC2N	-0.199874	2.63405	-9.05333	6.22e-17	1.06e-15	27.6972
TST	-0.161006	3.23313	-9.05292	6.23e-17	1.06e-15	27.6944
EHF	-0.242174	3.15222	-9.04952	6.38e-17	1.09e-15	27.6718
HMGA2	0.162426	2.27316	9.04827	6.43e-17	1.09e-15	27.6635
UBXN7	0.118613	3.14865	9.04557	6.55e-17	1.11e-15	27.6456
PRTFDC1	0.228794	2.93317	9.04367	6.63e-17	1.13e-15	27.6329
CD101	0.0992689	2.44929	9.03899	6.85e-17	1.16e-15	27.6018
LGALS3BP	0.115101	3.4542	9.03424	7.07e-17	1.2e-15	27.5702
CEMIP	0.176653	2.82719	9.03003	7.27e-17	1.23e-15	27.5422
LGI3	-0.0976067	2.80087	-9.02952	7.3e-17	1.24e-15	27.5388
RPIA	-0.100285	3.1196	-9.01895	7.84e-17	1.33e-15	27.4686
SNX29	-0.0908664	2.73162	-9.01481	8.06e-17	1.36e-15	27.4411
SH3GLB1	-0.049655	3.38268	-9.0135	8.13e-17	1.37e-15	27.4324
SOD2	0.201159	3.09111	9.00576	8.56e-17	1.45e-15	27.381
RBKS	-0.101806	2.86458	-9.00473	8.62e-17	1.45e-15	27.3741
B3GNT9	0.10798	2.8605	9.0019	8.79e-17	1.48e-15	27.3554
SKIL	0.127817	2.80421	8.99802	9.02e-17	1.52e-15	27.3297
MACO1	-0.0803379	3.04539	-8.99573	9.16e-17	1.54e-15	27.3145
LRRC8C	0.0988386	2.57112	8.99498	9.21e-17	1.55e-15	27.3095
RGS20	0.26662	2.79421	8.99329	9.31e-17	1.56e-15	27.2983
KTI12	0.106878	2.80899	8.99276	9.35e-17	1.57e-15	27.2947
ZNF43	-0.121293	2.77326	-8.98848	9.62e-17	1.61e-15	27.2663
LTBP4	-0.0978794	2.8231	-8.98839	9.63e-17	1.61e-15	27.2657
SPATS2	0.133132	2.77955	8.98793	9.65e-17	1.62e-15	27.2627
CNOT1	-0.0746725	3.16997	-8.98707	9.71e-17	1.63e-15	27.257
RMND5A	-0.112829	3.00134	-8.98681	9.73e-17	1.63e-15	27.2553
C1QB	0.234607	3.19111	8.98564	9.8e-17	1.64e-15	27.2475
GALR3	-0.0937803	2.82353	-8.97907	1.02e-16	1.71e-15	27.204
UBAP1L	-0.052839	2.69354	-8.97445	1.06e-16	1.76e-15	27.1733
SUCLG1	-0.0581187	2.94853	-8.97302	1.07e-16	1.78e-15	27.1639
ANXA5	0.0922076	3.53817	8.96674	1.11e-16	1.85e-15	27.1223
HYKK	-0.108707	2.38195	-8.96213	1.15e-16	1.91e-15	27.0917
ARMC9	0.0800254	2.42396	8.96189	1.15e-16	1.91e-15	27.0901
PPP1R1A	-0.186861	2.44683	-8.9611	1.16e-16	1.92e-15	27.0849
KRT33A	-0.215563	2.64608	-8.96014	1.16e-16	1.93e-15	27.0785
SLC25A26	-0.0699952	3.02558	-8.95627	1.19e-16	1.98e-15	27.0529
CDCA5	0.165251	2.99427	8.95135	1.23e-16	2.05e-15	27.0203
CDKN1A	0.128996	3.35594	8.95034	1.24e-16	2.06e-15	27.0137
TMED3	-0.0680942	2.59743	-8.94409	1.3e-16	2.14e-15	26.9723
UFL1	-0.0739195	2.94091	-8.93961	1.34e-16	2.21e-15	26.9427
SUSD4	-0.306333	2.88298	-8.93716	1.36e-16	2.24e-15	26.9265
CYP3A7-CYP3A51P	-0.100853	2.65041	-8.93534	1.37e-16	2.27e-15	26.9144
KHDC1L	0.433321	2.63068	8.93505	1.38e-16	2.27e-15	26.9125
DUSP6	0.174648	3.26286	8.93503	1.38e-16	2.27e-15	26.9124
CCN1	0.294741	3.24959	8.92514	1.47e-16	2.42e-15	26.847
RNF180	-0.099933	2.08015	-8.92253	1.5e-16	2.46e-15	26.8298
PRSS3	-0.315764	3.13219	-8.92242	1.5e-16	2.46e-15	26.829
SPINK5	-0.402644	3.49165	-8.92171	1.51e-16	2.47e-15	26.8244
UBFD1	0.0897056	3.01185	8.92036	1.52e-16	2.49e-15	26.8154
IL24	0.428282	2.82355	8.91738	1.55e-16	2.54e-15	26.7957
PSMD2	0.0851363	3.46994	8.9156	1.57e-16	2.57e-15	26.784
SNAP47	0.0682008	3.10596	8.90821	1.65e-16	2.7e-15	26.7352
POMGNT1	0.0961272	2.60149	8.90669	1.67e-16	2.72e-15	26.7251
ENPEP	0.29675	2.45037	8.90417	1.69e-16	2.77e-15	26.7085
COX4I1	-0.0525332	3.18701	-8.90335	1.7e-16	2.78e-15	26.7031
MYO18A	-0.12241	3.12058	-8.90151	1.72e-16	2.81e-15	26.6909
PRPF4	0.102579	3.23207	8.90072	1.73e-16	2.83e-15	26.6857
OXGR1	-0.181146	2.20999	-8.90034	1.74e-16	2.83e-15	26.6832
MLYCD	-0.0579649	2.82301	-8.89715	1.77e-16	2.89e-15	26.6621
USP18	0.277077	2.8258	8.89454	1.81e-16	2.94e-15	26.6449
HOXD11	0.216913	2.66915	8.89059	1.85e-16	3.01e-15	26.6189
GPX8	0.254865	2.92295	8.88911	1.87e-16	3.04e-15	26.6091
MAP7D1	0.11297	3.23985	8.8879	1.89e-16	3.06e-15	26.6011
DUSP16	-0.0810154	2.92373	-8.88789	1.89e-16	3.06e-15	26.601
PKM	0.0877454	3.28994	8.88401	1.94e-16	3.14e-15	26.5754
ADORA3	0.190471	2.59249	8.88386	1.94e-16	3.14e-15	26.5745
GSTZ1	-0.114756	3.05377	-8.88137	1.97e-16	3.19e-15	26.558
PCDHB14	0.31907	2.57359	8.87359	2.08e-16	3.36e-15	26.5068
MTERF3	0.0977326	3.20227	8.87165	2.1e-16	3.4e-15	26.494
UBE2Q2	0.118847	3.32788	8.86737	2.17e-16	3.5e-15	26.4658
ZBTB7C	-0.191719	2.75975	-8.8619	2.25e-16	3.62e-15	26.4297
YWHAG	0.0577618	3.61581	8.86026	2.27e-16	3.66e-15	26.4189
ZNF212	-0.0640263	3.07694	-8.8566	2.33e-16	3.75e-15	26.3948
TACC1	-0.109103	2.83049	-8.85267	2.39e-16	3.84e-15	26.3689
APBB2	0.1431	2.70194	8.84846	2.46e-16	3.95e-15	26.3412
ADAMDEC1	0.480573	2.91333	8.84574	2.5e-16	4.02e-15	26.3233
EIF5A2	0.219516	2.44318	8.84065	2.59e-16	4.16e-15	26.2898
SLC11A2	-0.0936625	2.91351	-8.83886	2.62e-16	4.2e-15	26.278
CSTF2	-0.124759	2.77869	-8.83789	2.64e-16	4.23e-15	26.2717
GFRA1	-0.119209	2.45798	-8.83555	2.68e-16	4.29e-15	26.2563
MORC2	0.0847078	2.91742	8.8335	2.72e-16	4.35e-15	26.2428
PTRH2	0.0864826	3.17764	8.83337	2.72e-16	4.35e-15	26.242
USP4	-0.0850994	3.02273	-8.83312	2.72e-16	4.35e-15	26.2403
TAF2	0.0638012	3.17881	8.83087	2.76e-16	4.41e-15	26.2255
CCDC6	-0.0955032	3.24956	-8.82808	2.82e-16	4.49e-15	26.2071
LIPG	0.363658	2.51906	8.82718	2.83e-16	4.52e-15	26.2013
PCBD2	-0.121011	2.83642	-8.82643	2.85e-16	4.53e-15	26.1963
MYO6	-0.14704	3.14083	-8.82625	2.85e-16	4.54e-15	26.1951
TTC7B	0.24953	2.78168	8.82382	2.9e-16	4.61e-15	26.1792
LOC101927272	-0.102674	2.21534	-8.81721	3.03e-16	4.81e-15	26.1357
CEACAM5	-0.269079	3.01597	-8.81462	3.08e-16	4.89e-15	26.1187
HS3ST6	-0.210009	2.47233	-8.81195	3.13e-16	4.97e-15	26.1012
BCKDHA	-0.0802587	3.21475	-8.80855	3.21e-16	5.08e-15	26.0789
PPP1R3E	-0.120519	2.74419	-8.80854	3.21e-16	5.08e-15	26.0788
KLF13	0.0822104	2.78796	8.80724	3.23e-16	5.12e-15	26.0703
ARSJ	0.29188	2.59066	8.80616	3.26e-16	5.15e-15	26.0632
IRF2BPL	0.0721947	3.43243	8.80103	3.37e-16	5.33e-15	26.0294
MMP13	0.602317	2.7907	8.79878	3.42e-16	5.41e-15	26.0147
LDOC1	-0.213513	2.97536	-8.79677	3.47e-16	5.47e-15	26.0015
RDH13	-0.109391	2.88006	-8.79658	3.47e-16	5.48e-15	26.0003
PML	0.0933452	2.81506	8.79318	3.55e-16	5.6e-15	25.9779
RAB23	0.154377	2.92566	8.792	3.58e-16	5.64e-15	25.9702
N4BP3	-0.116687	2.32308	-8.79118	3.6e-16	5.66e-15	25.9648
OR1F2P	0.111811	2.47008	8.7904	3.62e-16	5.69e-15	25.9597
DHRS9	-0.291631	3.11433	-8.79039	3.62e-16	5.69e-15	25.9596
ISOC1	-0.148215	3.15588	-8.78569	3.73e-16	5.86e-15	25.9288
FLNB	0.090703	3.30241	8.78369	3.78e-16	5.94e-15	25.9157
GLI3	0.113319	2.85294	8.78353	3.79e-16	5.94e-15	25.9146
IGBP1	-0.0542934	3.31443	-8.78169	3.83e-16	6.01e-15	25.9026
CTPS1	0.134594	3.04958	8.77952	3.89e-16	6.09e-15	25.8883
LAMA3	0.14266	2.68804	8.77745	3.94e-16	6.17e-15	25.8748
COL10A1	0.462184	2.73749	8.77507	4.01e-16	6.26e-15	25.8592
IL12A	-0.135011	2.14356	-8.77455	4.02e-16	6.28e-15	25.8557
SLC7A4	-0.0847672	2.49654	-8.77164	4.1e-16	6.39e-15	25.8367
ZNF273	-0.164905	2.55089	-8.77157	4.1e-16	6.39e-15	25.8362
ATP1B1	-0.108588	3.60087	-8.769	4.17e-16	6.5e-15	25.8194
AIM2	0.367701	3.09174	8.76836	4.19e-16	6.52e-15	25.8152
SCARA5	-0.244831	2.73779	-8.76781	4.21e-16	6.54e-15	25.8116
TCAIM	-0.109983	2.61615	-8.76744	4.22e-16	6.55e-15	25.8091
DKK4	-0.152638	2.37689	-8.76442	4.3e-16	6.68e-15	25.7894
SNX3	-0.0472013	3.52833	-8.76442	4.3e-16	6.68e-15	25.7894
NFIX	-0.100061	2.74381	-8.76277	4.35e-16	6.74e-15	25.7785
AATF	0.0684421	3.20324	8.76235	4.36e-16	6.76e-15	25.7758
PUF60	0.0773441	3.34486	8.76094	4.4e-16	6.82e-15	25.7666
ZNF662	-0.209462	2.52484	-8.75971	4.44e-16	6.87e-15	25.7585
MBNL3	-0.121295	2.69623	-8.75935	4.45e-16	6.88e-15	25.7562
RHOC	0.0816845	2.93421	8.75917	4.45e-16	6.88e-15	25.755
BAK1	0.120064	2.97914	8.75553	4.56e-16	7.04e-15	25.7312
PCYOX1	-0.108741	3.20439	-8.75412	4.61e-16	7.1e-15	25.7219
ZNF296	-0.0967718	2.6885	-8.74977	4.74e-16	7.31e-15	25.6934
RCN3	0.166024	3.00977	8.74915	4.76e-16	7.33e-15	25.6894
ACP5	0.159455	3.19411	8.74225	4.98e-16	7.67e-15	25.6442
PRR5L	0.0948816	2.41564	8.7391	5.09e-16	7.83e-15	25.6236
TF	-0.2931	2.59617	-8.73746	5.14e-16	7.91e-15	25.6129
ETHE1	-0.111787	3.28433	-8.73716	5.15e-16	7.92e-15	25.6109
NBPF20	0.13065	2.73354	8.73438	5.25e-16	8.06e-15	25.5928
KCNT2	-0.214248	2.34488	-8.73415	5.26e-16	8.06e-15	25.5913
PCGF6	0.113373	2.85087	8.73372	5.27e-16	8.08e-15	25.5884
SCNN1A	-0.154567	2.93632	-8.72838	5.46e-16	8.36e-15	25.5535
CCT3	0.0630102	3.46984	8.72832	5.47e-16	8.36e-15	25.5531
CBX3	0.0993316	3.0769	8.72711	5.51e-16	8.42e-15	25.5452
ATP5MD	-0.0451086	3.69891	-8.72584	5.56e-16	8.49e-15	25.5369
ZNF879	-0.145216	2.62578	-8.72483	5.59e-16	8.54e-15	25.5303
PIM1	-0.125475	3.17803	-8.7238	5.63e-16	8.59e-15	25.5235
C18orf54	0.107153	2.36705	8.72264	5.68e-16	8.65e-15	25.516
LOC100996756	-0.17319	2.57691	-8.72025	5.77e-16	8.78e-15	25.5004
GNB1	0.0595729	3.31301	8.72021	5.77e-16	8.78e-15	25.5001
HDHD2	-0.106186	3.18543	-8.71788	5.86e-16	8.91e-15	25.4849
EEPD1	-0.0458437	2.57852	-8.71365	6.02e-16	9.15e-15	25.4573
VAT1	-0.103332	3.28957	-8.71243	6.07e-16	9.22e-15	25.4492
C4orf19	-0.272956	2.41752	-8.71101	6.13e-16	9.3e-15	25.44
CCL11	0.326044	2.87469	8.71084	6.14e-16	9.31e-15	25.4389
TGM3	-0.54268	3.34914	-8.71038	6.16e-16	9.33e-15	25.4359
NCK2	-0.071518	3.28902	-8.71001	6.17e-16	9.34e-15	25.4335
ABHD14B	-0.136087	3.02177	-8.7056	6.35e-16	9.61e-15	25.4047
ERVMER34-1	0.227265	2.63709	8.70509	6.38e-16	9.64e-15	25.4013
TSC22D4	-0.0882256	2.7637	-8.70424	6.41e-16	9.69e-15	25.3958
MAPKAPK2	0.0786867	2.98919	8.69903	6.64e-16	1e-14	25.3618
COL18A1	0.150614	3.0587	8.69805	6.68e-16	1.01e-14	25.3554
SLC4A2	0.0892607	2.94246	8.69731	6.71e-16	1.01e-14	25.3506
ZBTB5	-0.101369	3.17991	-8.69462	6.83e-16	1.03e-14	25.333
GPRASP1	-0.17277	2.78212	-8.6921	6.95e-16	1.05e-14	25.3165
ABI3BP	-0.264512	2.56093	-8.69193	6.96e-16	1.05e-14	25.3154
GANAB	0.0643709	3.35369	8.69189	6.96e-16	1.05e-14	25.3152
OXSM	-0.0851135	2.96742	-8.69171	6.97e-16	1.05e-14	25.314
GPR137B	0.122929	3.14846	8.68801	7.14e-16	1.07e-14	25.2899
RGS3	0.0839278	2.73311	8.68663	7.2e-16	1.08e-14	25.2809
IGF2R	0.0770302	3.00087	8.68375	7.34e-16	1.1e-14	25.2621
HOXB7	0.211256	2.7533	8.6827	7.39e-16	1.11e-14	25.2552
ADRB1	-0.0934954	2.1748	-8.6817	7.44e-16	1.11e-14	25.2487
WDFY3-AS2	-0.0716673	2.18862	-8.67986	7.53e-16	1.13e-14	25.2367
KLHL5	0.133965	2.82132	8.67932	7.56e-16	1.13e-14	25.2332
TMEM185B	0.100777	2.92282	8.67878	7.59e-16	1.13e-14	25.2297
EXT2	0.107783	2.93339	8.67782	7.64e-16	1.14e-14	25.2234
HSP90AA1	0.0610783	3.71027	8.67631	7.71e-16	1.15e-14	25.2136
NFASC	-0.0950985	2.44996	-8.67385	7.84e-16	1.17e-14	25.1976
TRIM27	0.0750778	3.09202	8.67211	7.93e-16	1.18e-14	25.1862
NRG1	0.181957	2.62813	8.67187	7.94e-16	1.18e-14	25.1846
FBXW4	-0.0761701	3.15854	-8.67178	7.95e-16	1.18e-14	25.1841
STOM	0.0786092	2.95189	8.66994	8.04e-16	1.2e-14	25.172
RFC4	0.169903	3.17915	8.66814	8.14e-16	1.21e-14	25.1603
LIPA	0.0990649	2.96538	8.66126	8.52e-16	1.26e-14	25.1156
CYP2C18	-0.416869	2.89005	-8.66123	8.52e-16	1.26e-14	25.1154
C17orf58	-0.106485	3.05123	-8.6602	8.58e-16	1.27e-14	25.1086
E2F7	0.168846	2.66666	8.65869	8.67e-16	1.28e-14	25.0988
FJX1	0.216921	2.99292	8.65821	8.69e-16	1.29e-14	25.0957
STX2	0.0899144	2.8071	8.65616	8.81e-16	1.3e-14	25.0823
OSR1	-0.220147	2.46678	-8.6536	8.96e-16	1.32e-14	25.0656
FAR1	-0.110514	3.11741	-8.65316	8.99e-16	1.33e-14	25.0628
NDUFA2	-0.042793	2.85028	-8.65011	9.17e-16	1.35e-14	25.0429
TAMM41	-0.0565893	2.62715	-8.64816	9.29e-16	1.37e-14	25.0303
TP63	0.184949	2.98396	8.6478	9.31e-16	1.37e-14	25.0279
NAT14	0.118074	2.65363	8.6475	9.33e-16	1.37e-14	25.026
RNF168	0.0975516	2.79759	8.64466	9.51e-16	1.4e-14	25.0075
ABLIM1	-0.163414	3.34026	-8.63996	9.81e-16	1.44e-14	24.9769
TCEAL9	0.103757	3.4712	8.63991	9.81e-16	1.44e-14	24.9766
KIAA1191	-0.0580581	3.36651	-8.63618	1.01e-15	1.48e-14	24.9523
SLC16A7	-0.238727	2.74779	-8.63497	1.01e-15	1.49e-14	24.9444
CKS1B	0.109025	3.41005	8.63417	1.02e-15	1.49e-14	24.9392
USP30	-0.0803953	2.81082	-8.63278	1.03e-15	1.51e-14	24.9302
NMI	0.104355	3.36008	8.63159	1.04e-15	1.52e-14	24.9225
MEOX2	-0.228331	2.18249	-8.62326	1.09e-15	1.6e-14	24.8683
DUOX1	-0.153509	2.74344	-8.61825	1.13e-15	1.65e-14	24.8358
FAM219A	0.11431	2.76262	8.61808	1.13e-15	1.65e-14	24.8346
HMGN5	-0.166562	2.45672	-8.61528	1.15e-15	1.68e-14	24.8165
MSC-AS1	0.227672	2.54628	8.61391	1.16e-15	1.7e-14	24.8076
ADD3-AS1	-0.0423726	2.30185	-8.61329	1.17e-15	1.7e-14	24.8036
TUBB	0.0676537	3.62149	8.61113	1.19e-15	1.73e-14	24.7895
SNX9	-0.097553	3.2621	-8.61076	1.19e-15	1.73e-14	24.7871
TEX101	-0.131079	2.53649	-8.60768	1.21e-15	1.76e-14	24.7671
ZSCAN18	-0.135282	2.75476	-8.60611	1.23e-15	1.78e-14	24.757
DMXL1	-0.120684	3.0426	-8.6039	1.24e-15	1.81e-14	24.7426
TGFB3	0.111343	2.67561	8.60379	1.24e-15	1.81e-14	24.7418
2024-03-02	-0.151289	2.62535	-8.60194	1.26e-15	1.83e-14	24.7299
PTGS2	0.453237	2.78246	8.60041	1.27e-15	1.84e-14	24.72
ERBB3	-0.121025	2.77853	-8.59761	1.3e-15	1.88e-14	24.7018
PYGM	-0.384321	2.6551	-8.59678	1.3e-15	1.89e-14	24.6964
PRSS23	0.179363	2.96879	8.59161	1.35e-15	1.95e-14	24.6629
TTC4	0.0782322	3.07987	8.58633	1.4e-15	2.02e-14	24.6286
FCGR3B	0.268006	2.95256	8.58328	1.42e-15	2.06e-14	24.6088
KDM1A	0.0761398	3.19291	8.58076	1.45e-15	2.09e-14	24.5925
RAVER2	-0.120384	2.45215	-8.57585	1.5e-15	2.16e-14	24.5606
PRR16	0.172311	2.42887	8.57336	1.52e-15	2.19e-14	24.5446
AFF3	-0.0935475	2.24512	-8.57002	1.55e-15	2.24e-14	24.5229
SNAPC1	0.185502	3.08225	8.56974	1.56e-15	2.24e-14	24.5211
C1orf21	-0.104132	2.75164	-8.56806	1.57e-15	2.26e-14	24.5102
PPARGC1A	-0.127463	2.26955	-8.56502	1.61e-15	2.31e-14	24.4905
SH3GL1	-0.0925514	3.17904	-8.56473	1.61e-15	2.31e-14	24.4886
ADGRG2	-0.266333	2.31642	-8.55784	1.68e-15	2.42e-14	24.444
P4HA2	0.132143	2.84402	8.55549	1.71e-15	2.45e-14	24.4288
IFI44L	0.411713	3.08723	8.55341	1.73e-15	2.48e-14	24.4154
ACADM	-0.0979486	3.22088	-8.55215	1.75e-15	2.5e-14	24.4072
ARF6	-0.0686315	3.40625	-8.55121	1.76e-15	2.52e-14	24.4012
VPS13D	-0.0722766	2.77688	-8.54943	1.78e-15	2.54e-14	24.3896
B4GALT2	0.0863043	2.94976	8.54897	1.78e-15	2.55e-14	24.3866
PIGN	-0.161444	2.91925	-8.54474	1.84e-15	2.62e-14	24.3593
ZCCHC17	0.0538116	3.1467	8.54405	1.84e-15	2.63e-14	24.3548
CALD1	0.170142	3.03554	8.54395	1.84e-15	2.63e-14	24.3542
EEF1B2	-0.0498404	3.7181	-8.54277	1.86e-15	2.65e-14	24.3465
USP46-AS1	-0.128175	2.26002	-8.54131	1.88e-15	2.67e-14	24.3371
CD44	0.111191	3.17603	8.53789	1.92e-15	2.73e-14	24.315
SMAD9	-0.177814	2.59534	-8.53637	1.94e-15	2.76e-14	24.3051
ITPR3	0.0705822	2.86864	8.53429	1.97e-15	2.79e-14	24.2917
SLC52A2	0.129226	3.02591	8.53269	1.99e-15	2.82e-14	24.2814
ODC1	0.197127	3.53691	8.53129	2e-15	2.84e-14	24.2723
TTI1	0.0885172	3.02561	8.53115	2.01e-15	2.85e-14	24.2714
CD86	0.183013	2.79239	8.52983	2.02e-15	2.87e-14	24.2628
MSX2	0.129648	2.31591	8.52914	2.03e-15	2.88e-14	24.2584
OAS3	0.176013	3.01188	8.52663	2.07e-15	2.92e-14	24.2422
PLA2G12A	-0.105589	3.03538	-8.52439	2.1e-15	2.97e-14	24.2277
FUCA2	0.0819305	3.16451	8.52411	2.1e-15	2.97e-14	24.2259
PPP1R13B	-0.121243	2.88427	-8.52357	2.11e-15	2.98e-14	24.2225
DERL1	0.0600291	3.18532	8.51912	2.17e-15	3.06e-14	24.1937
ENTPD5	-0.0767386	2.60944	-8.51716	2.2e-15	3.1e-14	24.181
SCGB2A1	-0.40885	2.30793	-8.51532	2.23e-15	3.14e-14	24.1692
RERE	-0.0484804	2.54512	-8.51473	2.23e-15	3.15e-14	24.1654
TREM1	0.299717	2.85721	8.51175	2.28e-15	3.21e-14	24.1461
PLEKHN1	-0.0913713	2.95579	-8.51147	2.28e-15	3.21e-14	24.1443
LIFR	-0.222286	2.54331	-8.51091	2.29e-15	3.22e-14	24.1407
F10	-0.110372	2.45821	-8.50951	2.31e-15	3.25e-14	24.1316
RAB29	0.111124	2.95807	8.50915	2.32e-15	3.25e-14	24.1293
TTC19	-0.0599164	2.78974	-8.50619	2.36e-15	3.31e-14	24.1102
KCNE4	0.18401	2.48994	8.50599	2.37e-15	3.32e-14	24.109
MPRIP	-0.0540759	2.9625	-8.50543	2.37e-15	3.33e-14	24.1053
GID8	-0.0758783	3.21676	-8.5009	2.45e-15	3.42e-14	24.0761
ANKLE2	0.0939017	2.83242	8.50089	2.45e-15	3.42e-14	24.0761
ALOX12	-0.368066	2.96907	-8.50013	2.46e-15	3.44e-14	24.0711
TUBG1	0.0967043	3.15616	8.49417	2.56e-15	3.57e-14	24.0327
IRF7	0.200557	3.10748	8.4927	2.58e-15	3.6e-14	24.0232
HDGFL3	0.134458	2.78902	8.49177	2.6e-15	3.62e-14	24.0172
PAMR1	-0.167601	2.95796	-8.48959	2.63e-15	3.67e-14	24.0031
EP300-AS1	-0.28866	2.49793	-8.48741	2.67e-15	3.72e-14	23.9891
QRICH1	-0.043028	3.03562	-8.48719	2.68e-15	3.73e-14	23.9877
SPTLC1	-0.0911982	3.12346	-8.48463	2.72e-15	3.79e-14	23.9712
ITGB1	0.0896168	2.80009	8.48281	2.75e-15	3.83e-14	23.9595
OLMALINC	-0.121896	2.19445	-8.48235	2.76e-15	3.84e-14	23.9565
COPS9	-0.0485038	2.9415	-8.48096	2.79e-15	3.87e-14	23.9475
GPM6A	-0.0975248	2.32008	-8.47841	2.83e-15	3.93e-14	23.9311
CX3CR1	-0.150087	2.57863	-8.4725	2.95e-15	4.08e-14	23.8931
ZNF429	-0.060859	2.37546	-8.47116	2.97e-15	4.12e-14	23.8844
CCDC115	-0.0739478	3.16657	-8.46896	3.01e-15	4.17e-14	23.8703
BICD1	0.160602	2.64598	8.46491	3.1e-15	4.28e-14	23.8442
GPX3	-0.237357	3.32473	-8.46347	3.12e-15	4.32e-14	23.8349
PRCC	0.0857239	2.91755	8.46334	3.13e-15	4.32e-14	23.8341
LAMP5	0.258	2.71309	8.46264	3.14e-15	4.34e-14	23.8295
AP2B1	0.118741	3.07977	8.46073	3.18e-15	4.39e-14	23.8173
ALDH1A1	-0.43671	2.97988	-8.45854	3.23e-15	4.45e-14	23.8032
CDC42EP3	0.192069	2.97967	8.45818	3.23e-15	4.46e-14	23.8008
FLAD1	0.0778032	3.05367	8.45716	3.26e-15	4.48e-14	23.7943
MMUT	-0.0936116	3.08244	-8.45568	3.29e-15	4.52e-14	23.7848
ERBB2	-0.0999421	2.6827	-8.45557	3.29e-15	4.52e-14	23.7841
TSGA10	-0.0611123	2.19044	-8.45431	3.32e-15	4.56e-14	23.776
PPIB	0.0651984	3.61767	8.45371	3.33e-15	4.57e-14	23.7721
ZNF469	0.124171	2.96051	8.45312	3.34e-15	4.59e-14	23.7683
SGK1	0.101627	3.61935	8.45206	3.37e-15	4.62e-14	23.7615
FKBP14	0.158659	2.87825	8.45155	3.38e-15	4.63e-14	23.7582
FMC1	-0.108311	3.02237	-8.45075	3.4e-15	4.65e-14	23.7531
SLC30A7	0.088515	3.07434	8.44942	3.42e-15	4.69e-14	23.7445
CTNS	0.0759948	2.73309	8.44649	3.49e-15	4.78e-14	23.7257
RFLNB	0.188227	3.1015	8.44587	3.51e-15	4.79e-14	23.7217
TENM3	0.13085	2.47378	8.44015	3.64e-15	4.97e-14	23.6849
KIF18A	0.209995	2.59371	8.43951	3.65e-15	4.99e-14	23.6808
GLIPR1	0.183992	3.03848	8.43711	3.71e-15	5.06e-14	23.6654
DLAT	-0.105354	3.05305	-8.43455	3.77e-15	5.15e-14	23.649
CYB561	-0.0679929	3.11021	-8.4329	3.81e-15	5.2e-14	23.6383
GAS1	0.201371	2.96408	8.43277	3.82e-15	5.2e-14	23.6375
CASTOR1	-0.186847	2.76088	-8.42684	3.97e-15	5.4e-14	23.5994
CLIC3	-0.33921	3.32688	-8.42586	3.99e-15	5.43e-14	23.5931
IRX4	0.278783	2.70969	8.4199	4.15e-15	5.64e-14	23.5549
HDGF	0.0608821	3.48793	8.41485	4.29e-15	5.83e-14	23.5224
LRRN4CL	-0.253755	2.57741	-8.41351	4.33e-15	5.87e-14	23.5139
NAAA	-0.116057	2.83678	-8.41328	4.33e-15	5.88e-14	23.5124
BOC	-0.138601	2.8984	-8.41279	4.35e-15	5.89e-14	23.5092
PRKAR2A	-0.0568111	3.21947	-8.41191	4.37e-15	5.92e-14	23.5036
IVNS1ABP	0.0996472	3.09429	8.41016	4.42e-15	5.99e-14	23.4923
CCSAP	0.0680648	2.43814	8.40769	4.5e-15	6.08e-14	23.4765
UPRT	-0.152327	2.78418	-8.40596	4.55e-15	6.15e-14	23.4654
NR2F2-AS1	-0.161718	2.42387	-8.40575	4.55e-15	6.15e-14	23.4641
MORF4L1	0.0535264	3.53303	8.40373	4.61e-15	6.23e-14	23.4511
C3orf52	0.186832	2.6244	8.40044	4.71e-15	6.36e-14	23.4301
DBI	-0.0917574	3.63802	-8.39902	4.76e-15	6.41e-14	23.4209
CBR4	-0.0945127	2.98634	-8.39859	4.77e-15	6.43e-14	23.4182
ZNF540	-0.0968356	2.37252	-8.39848	4.77e-15	6.43e-14	23.4174
INO80C	-0.0856553	2.93888	-8.39788	4.79e-15	6.45e-14	23.4137
BFAR	0.0982584	3.13563	8.39733	4.81e-15	6.47e-14	23.4101
PPOX	-0.0575934	2.43979	-8.3971	4.82e-15	6.47e-14	23.4086
ITGA1	0.160732	2.52884	8.39609	4.85e-15	6.51e-14	23.4021
MRPS36	-0.0789259	3.27059	-8.39237	4.97e-15	6.67e-14	23.3783
PHLDB3	-0.121205	2.69628	-8.39077	5.02e-15	6.73e-14	23.3681
AP3M1	-0.0581724	2.98951	-8.38693	5.15e-15	6.9e-14	23.3435
ITGA9-AS1	-0.101924	2.28983	-8.38652	5.16e-15	6.91e-14	23.3408
RAB11B-AS1	-0.0999822	2.49723	-8.38486	5.22e-15	6.98e-14	23.3302
PDIA5	0.136004	3.13212	8.38159	5.33e-15	7.13e-14	23.3092
NDUFA13	-0.0448411	3.50864	-8.38063	5.36e-15	7.17e-14	23.3031
GAB1	-0.109601	2.70605	-8.38003	5.38e-15	7.19e-14	23.2993
DLEU1	-0.126292	3.02137	-8.37805	5.45e-15	7.28e-14	23.2866
MIR503HG	0.131343	2.719	8.37715	5.48e-15	7.32e-14	23.2809
SH3PXD2A-AS1	-0.279021	2.66347	-8.3756	5.54e-15	7.39e-14	23.2709
PPA2	-0.0550236	2.85113	-8.37552	5.54e-15	7.39e-14	23.2704
M6PR	0.0713196	3.28327	8.37519	5.55e-15	7.4e-14	23.2683
CMC2	0.0683496	3.29404	8.37491	5.56e-15	7.4e-14	23.2665
ABCC4	0.122456	2.50207	8.37354	5.61e-15	7.47e-14	23.2577
MFSD6	-0.160259	3.13567	-8.3719	5.67e-15	7.54e-14	23.2473
KIAA1143	-0.0559479	3.18615	-8.37188	5.67e-15	7.54e-14	23.2471
EIF3K	-0.0528314	3.36782	-8.36399	5.97e-15	7.93e-14	23.1966
HSD17B10	-0.0648124	3.37159	-8.35937	6.15e-15	8.17e-14	23.1671
C4orf46	0.193645	2.60389	8.35531	6.32e-15	8.37e-14	23.1411
RALGAPA1	-0.0507442	2.6428	-8.3553	6.32e-15	8.37e-14	23.1411
ELF3	-0.261807	2.9725	-8.35295	6.42e-15	8.5e-14	23.1261
MUC15	-0.422237	2.88466	-8.34918	6.58e-15	8.7e-14	23.1019
EPB41L4B	0.127385	2.54076	8.34756	6.65e-15	8.79e-14	23.0916
RAB34	0.0911589	3.26239	8.34186	6.9e-15	9.11e-14	23.0552
C6orf141	0.25078	2.68447	8.34142	6.91e-15	9.13e-14	23.0524
LYRM7	-0.113849	2.84772	-8.34108	6.93e-15	9.15e-14	23.0502
DCT	-0.233762	2.29828	-8.34056	6.95e-15	9.17e-14	23.0469
MYH14	-0.106839	2.8066	-8.3403	6.97e-15	9.18e-14	23.0452
RBSN	-0.0481752	2.77515	-8.33957	7e-15	9.22e-14	23.0405
CASP9	-0.064226	2.77074	-8.33931	7.01e-15	9.23e-14	23.0389
EMP2	-0.120618	3.26848	-8.33885	7.03e-15	9.25e-14	23.036
MET	0.166354	2.92905	8.33853	7.05e-15	9.26e-14	23.0339
MYL5	-0.147874	2.76849	-8.33763	7.09e-15	9.31e-14	23.0282
MICALCL	0.253264	2.54126	8.33596	7.16e-15	9.41e-14	23.0175
TLE2	-0.135326	2.81282	-8.33388	7.26e-15	9.53e-14	23.0042
NUDT16L1	-0.0690493	2.82564	-8.33355	7.28e-15	9.54e-14	23.0021
PRKAA2	-0.189841	2.27981	-8.33293	7.31e-15	9.58e-14	22.9981
CLSPN	0.0678165	2.25493	8.33021	7.44e-15	9.74e-14	22.9808
TCEA3	-0.162037	2.86584	-8.32985	7.45e-15	9.76e-14	22.9785
TOR1B	0.072587	3.12861	8.32936	7.48e-15	9.78e-14	22.9754
PXN	0.148427	2.79183	8.3265	7.62e-15	9.96e-14	22.9571
AP2M1	0.0776152	3.47068	8.32062	7.91e-15	1.03e-13	22.9196
BLACAT1	0.204469	2.49105	8.3197	7.96e-15	1.04e-13	22.9137
FAIM2	-0.0600936	2.4781	-8.31805	8.05e-15	1.05e-13	22.9032
ADM	0.14435	3.47754	8.31661	8.12e-15	1.06e-13	22.894
LMOD1	-0.116645	2.5139	-8.31325	8.3e-15	1.08e-13	22.8726
ARRB2	0.112457	2.92827	8.31269	8.33e-15	1.08e-13	22.869
MIR600HG	-0.103961	2.62425	-8.31145	8.4e-15	1.09e-13	22.8611
USP53	-0.130462	2.78014	-8.30978	8.49e-15	1.1e-13	22.8504
FAAH2	-0.155031	2.83393	-8.30774	8.6e-15	1.12e-13	22.8375
RASAL2	-0.0952555	2.88663	-8.30604	8.7e-15	1.13e-13	22.8266
SRGN	0.173381	3.30138	8.30355	8.84e-15	1.15e-13	22.8108
MTMR3	-0.0746403	2.78087	-8.30275	8.88e-15	1.15e-13	22.8056
C5orf63	-0.074161	2.44518	-8.30203	8.92e-15	1.16e-13	22.8011
ACLY	0.084574	3.2089	8.29916	9.09e-15	1.18e-13	22.7828
COMMD1	-0.0581823	3.28304	-8.29812	9.15e-15	1.19e-13	22.7762
ATP2B4	0.0646049	3.12578	8.29532	9.32e-15	1.21e-13	22.7583
STK17A	0.141702	2.89808	8.2929	9.47e-15	1.22e-13	22.7429
NOP53	-0.070817	3.33501	-8.28983	9.66e-15	1.25e-13	22.7234
CXCL11	0.623129	2.63733	8.2889	9.72e-15	1.25e-13	22.7175
SNORA68	-0.0521141	3.12583	-8.28802	9.77e-15	1.26e-13	22.7119
HLA-F	0.124894	3.38023	8.28707	9.83e-15	1.27e-13	22.7059
CDC45	0.157238	2.89142	8.28519	9.95e-15	1.28e-13	22.6939
RELB	0.159045	2.85704	8.27859	1.04e-14	1.34e-13	22.6519
ABCA1	0.107298	2.83061	8.27854	1.04e-14	1.34e-13	22.6516
CS	-0.054106	3.47162	-8.27528	1.06e-14	1.37e-13	22.6308
CAVIN3	0.195952	2.98719	8.27488	1.06e-14	1.37e-13	22.6282
PDLIM5	-0.0987694	2.9524	-8.27193	1.08e-14	1.39e-13	22.6095
E2F6	0.0880927	2.98411	8.27183	1.08e-14	1.39e-13	22.6089
MXD1	-0.18703	3.19997	-8.27166	1.09e-14	1.39e-13	22.6078
TMEM220	-0.148887	2.7577	-8.26776	1.11e-14	1.43e-13	22.583
TYROBP	0.16014	3.22873	8.26727	1.12e-14	1.43e-13	22.5799
ENTPD7	0.142978	2.79915	8.26682	1.12e-14	1.44e-13	22.577
NOXA1	-0.0833976	2.90397	-8.26537	1.13e-14	1.45e-13	22.5678
FAM20C	0.0710699	2.70284	8.26395	1.14e-14	1.46e-13	22.5588
FEN1	0.12576	3.12086	8.26301	1.15e-14	1.47e-13	22.5528
CAPN1	-0.0625676	3.14043	-8.26284	1.15e-14	1.47e-13	22.5517
CAMSAP2	0.107904	3.09459	8.26171	1.16e-14	1.48e-13	22.5445
IL18	-0.279703	3.10535	-8.26008	1.17e-14	1.49e-13	22.5342
SEMA3G	-0.182144	2.57801	-8.26006	1.17e-14	1.49e-13	22.5341
DDX58	0.192541	3.00997	8.26005	1.17e-14	1.49e-13	22.534
CCDC88A	0.122383	2.56181	8.25677	1.2e-14	1.52e-13	22.5131
TALDO1	-0.074827	3.58279	-8.2558	1.2e-14	1.53e-13	22.507
COL6A2	0.174887	3.19841	8.2537	1.22e-14	1.55e-13	22.4936
GLIS3	0.281972	2.5751	8.25341	1.22e-14	1.55e-13	22.4918
OPLAH	-0.154544	2.78534	-8.25203	1.23e-14	1.57e-13	22.483
CAMSAP1	-0.101381	2.71924	-8.24804	1.26e-14	1.61e-13	22.4577
USP7	-0.0574107	3.06421	-8.24646	1.28e-14	1.62e-13	22.4477
BCL2L12	0.100626	2.91422	8.24526	1.29e-14	1.63e-13	22.4401
PLCD1	-0.114014	3.14698	-8.2452	1.29e-14	1.63e-13	22.4397
ADAM8	0.127214	2.74792	8.24385	1.3e-14	1.65e-13	22.4311
CD24	-0.134324	3.63233	-8.24285	1.31e-14	1.66e-13	22.4247
DOCK9-DT	-0.0693457	2.47876	-8.24073	1.33e-14	1.68e-13	22.4113
FYCO1	-0.0845497	2.97326	-8.23456	1.38e-14	1.74e-13	22.3722
CXCL2	0.186857	2.52548	8.23456	1.38e-14	1.74e-13	22.3722
CLU	-0.265972	2.952	-8.23425	1.38e-14	1.75e-13	22.3702
KCTD6	-0.0972388	2.7328	-8.23221	1.4e-14	1.77e-13	22.3573
TRIP13	0.181969	3.06849	8.23108	1.41e-14	1.78e-13	22.3501
EPN2	-0.0912435	2.95202	-8.23057	1.42e-14	1.78e-13	22.3469
CCDC102B	0.218389	2.42284	8.22664	1.45e-14	1.83e-13	22.322
UQCRQ	-0.0516887	3.58269	-8.22625	1.46e-14	1.83e-13	22.3194
DTL	0.194247	3.00692	8.22339	1.48e-14	1.87e-13	22.3013
RPS15	-0.0389748	3.2789	-8.22253	1.49e-14	1.87e-13	22.2959
TRIM47	0.104191	3.08098	8.22122	1.5e-14	1.89e-13	22.2876
SNX1	-0.0521173	2.98518	-8.22092	1.51e-14	1.89e-13	22.2857
KIAA0754	0.0946299	2.65769	8.21892	1.53e-14	1.92e-13	22.273
ALKBH6	0.0949335	2.99619	8.21656	1.55e-14	1.94e-13	22.2581
MUS81	0.065852	3.06544	8.21525	1.56e-14	1.96e-13	22.2498
CYP27C1	0.313607	2.56926	8.21194	1.6e-14	2e-13	22.2288
WDHD1	0.178316	2.43998	8.2082	1.63e-14	2.05e-13	22.2051
GNLY	0.271175	2.84323	8.20688	1.65e-14	2.06e-13	22.1968
HSPBAP1	0.125564	3.0058	8.20437	1.68e-14	2.1e-13	22.1808
KRCC1	-0.115808	3.16856	-8.20386	1.68e-14	2.1e-13	22.1776
SLC16A1-AS1	0.103833	2.47821	8.20385	1.68e-14	2.1e-13	22.1776
MSR1	0.138584	2.34796	8.20297	1.69e-14	2.11e-13	22.172
CHMP2B	-0.081406	3.20086	-8.19933	1.73e-14	2.16e-13	22.1489
TNFRSF18	0.15495	2.72085	8.19846	1.74e-14	2.17e-13	22.1435
CUX1	0.109813	3.06193	8.19436	1.79e-14	2.23e-13	22.1175
CXCL3	0.391859	2.69923	8.18903	1.85e-14	2.3e-13	22.0838
PRPS1	0.104821	3.02035	8.18858	1.85e-14	2.31e-13	22.081
THOC6	0.112113	2.92513	8.184	1.91e-14	2.38e-13	22.052
ZNF626	-0.0619009	2.38229	-8.18379	1.91e-14	2.38e-13	22.0507
PRKCH	-0.0612015	2.94376	-8.18033	1.96e-14	2.43e-13	22.0288
GLS	0.0950834	2.78034	8.17701	2e-14	2.48e-13	22.0078
LAMB3	0.19417	3.40131	8.17564	2.02e-14	2.5e-13	21.9991
GSDMD	0.077851	3.07887	8.17462	2.03e-14	2.52e-13	21.9927
ARHGEF26	-0.237861	2.4155	-8.17437	2.03e-14	2.52e-13	21.9911
RIPOR3	0.119747	2.68085	8.17377	2.04e-14	2.53e-13	21.9873
PGM2L1	0.145292	2.73696	8.16926	2.1e-14	2.6e-13	21.9589
ANKRD13A	-0.0859192	3.15006	-8.16737	2.13e-14	2.63e-13	21.9469
BRCC3	-0.0875246	3.01531	-8.16404	2.17e-14	2.68e-13	21.9259
NAPEPLD	0.111996	2.58323	8.163	2.19e-14	2.7e-13	21.9193
MYEOV	-0.106797	2.68162	-8.16249	2.19e-14	2.71e-13	21.9161
HTRA2	0.057804	3.08814	8.16199	2.2e-14	2.71e-13	21.9129
RNASE4	-0.259922	2.91814	-8.16173	2.2e-14	2.72e-13	21.9113
RNF103	-0.0469638	3.1843	-8.16149	2.21e-14	2.72e-13	21.9098
SHISAL1	0.186149	2.70042	8.16106	2.21e-14	2.73e-13	21.9071
ATIC	0.0757134	3.30057	8.15906	2.24e-14	2.76e-13	21.8944
FEZ1	0.157988	2.77755	8.15665	2.28e-14	2.8e-13	21.8793
LYPD1	0.207661	2.52194	8.15563	2.29e-14	2.82e-13	21.8728
SLC27A2	-0.17926	2.50913	-8.15507	2.3e-14	2.83e-13	21.8693
SH3GLB2	-0.0919237	2.84051	-8.15503	2.3e-14	2.83e-13	21.869
PEBP4	-0.231916	2.40818	-8.15249	2.34e-14	2.87e-13	21.853
C14orf28	-0.122337	2.61026	-8.14988	2.38e-14	2.92e-13	21.8365
MAPKAPK3	-0.0894335	3.12348	-8.1491	2.39e-14	2.93e-13	21.8316
ZNF33B	-0.0877228	2.5648	-8.14747	2.41e-14	2.96e-13	21.8213
RTP4	0.248389	2.97697	8.14682	2.42e-14	2.97e-13	21.8173
COX14	-0.06052	3.21003	-8.14644	2.43e-14	2.97e-13	21.8148
TMEM125	-0.175597	2.86623	-8.14591	2.44e-14	2.98e-13	21.8115
UFC1	-0.0563422	3.44681	-8.14491	2.45e-14	3e-13	21.8052
SMTN	0.100662	2.68695	8.14463	2.46e-14	3e-13	21.8034
MRPS25	-0.0868547	2.84153	-8.14424	2.46e-14	3.01e-13	21.801
THOC7	-0.0645302	3.40301	-8.14388	2.47e-14	3.01e-13	21.7987
UBASH3B	0.121157	2.47686	8.14182	2.5e-14	3.05e-13	21.7857
OXR1	-0.0771602	2.81502	-8.14005	2.53e-14	3.09e-13	21.7746
TMEM40	-0.197831	3.14829	-8.13963	2.54e-14	3.09e-13	21.7719
COPS4	-0.0415237	2.81139	-8.13798	2.57e-14	3.12e-13	21.7615
HIBCH	-0.138266	3.12484	-8.13254	2.66e-14	3.23e-13	21.7272
DIS3L2	-0.104438	2.74194	-8.13175	2.67e-14	3.25e-13	21.7223
IL6	0.327479	2.91985	8.13067	2.69e-14	3.27e-13	21.7155
SPATA6	-0.109728	2.23292	-8.12947	2.71e-14	3.29e-13	21.7079
CSK	-0.0949469	3.2187	-8.12938	2.71e-14	3.29e-13	21.7073
SIAH1	0.115499	2.99665	8.12837	2.73e-14	3.31e-13	21.7009
RELN	-0.17024	2.65119	-8.12834	2.73e-14	3.31e-13	21.7008
MIR4435-2HG	0.0813815	2.22822	8.12785	2.74e-14	3.32e-13	21.6977
SERPINA5	-0.0930568	2.68665	-8.12493	2.79e-14	3.38e-13	21.6793
ABCG1	0.13327	2.72629	8.12409	2.8e-14	3.39e-13	21.674
SLC25A21	-0.106802	2.00956	-8.12349	2.82e-14	3.4e-13	21.6702
FPR1	0.176708	2.803	8.1224	2.83e-14	3.43e-13	21.6634
CXCL5	0.372889	2.43572	8.1208	2.86e-14	3.46e-13	21.6533
TRMT6	0.108903	3.02447	8.11909	2.9e-14	3.5e-13	21.6425
BSG	0.103526	3.32057	8.11596	2.95e-14	3.56e-13	21.6228
SOX21-AS1	-0.19079	2.32038	-8.1139	2.99e-14	3.61e-13	21.6099
RAD51	0.101994	2.60132	8.10866	3.1e-14	3.73e-13	21.5769
ALDH3A1	-0.389528	3.21051	-8.10629	3.14e-14	3.78e-13	21.562
CD14	0.133127	3.29589	8.10288	3.21e-14	3.87e-13	21.5405
SLURP1	-0.426933	3.2634	-8.09779	3.32e-14	3.99e-13	21.5086
DKK3	0.165251	2.78085	8.09427	3.39e-14	4.08e-13	21.4864
WWOX	-0.0734472	2.70497	-8.09359	3.41e-14	4.09e-13	21.4822
JMJD6	0.0564369	2.70384	8.0925	3.43e-14	4.12e-13	21.4753
EFNB1	0.109183	2.89924	8.09084	3.47e-14	4.16e-13	21.4649
SELENOH	-0.0547521	3.15186	-8.08915	3.51e-14	4.21e-13	21.4542
FBN2	0.194594	2.33323	8.08828	3.53e-14	4.23e-13	21.4488
RAB20	0.0770824	2.71154	8.0881	3.53e-14	4.23e-13	21.4476
CA2	0.353176	3.19425	8.0859	3.58e-14	4.29e-13	21.4339
KATNBL1	-0.1039	2.95169	-8.08204	3.67e-14	4.39e-13	21.4096
UQCR11	-0.0497672	3.24963	-8.07882	3.74e-14	4.48e-13	21.3894
TMEM9B	-0.0732709	3.28099	-8.07876	3.75e-14	4.48e-13	21.389
PLXNC1	0.147815	2.80575	8.07822	3.76e-14	4.49e-13	21.3856
AGO2	0.0833778	3.02137	8.07662	3.8e-14	4.53e-13	21.3756
ANKRD18B	-0.0763469	2.41208	-8.07601	3.81e-14	4.55e-13	21.3717
CCL14	-0.166836	2.57526	-8.0758	3.82e-14	4.55e-13	21.3704
BAG2	0.160507	2.51258	8.07521	3.83e-14	4.57e-13	21.3667
YIPF1	-0.0549151	3.1633	-8.07498	3.84e-14	4.57e-13	21.3653
NRIP3	0.175013	2.80565	8.07485	3.84e-14	4.57e-13	21.3645
PGAM2	-0.289533	2.53345	-8.0741	3.86e-14	4.59e-13	21.3598
WNT2	0.221124	2.67141	8.07405	3.86e-14	4.59e-13	21.3595
CENPI	0.107791	2.28304	8.0713	3.93e-14	4.67e-13	21.3422
SCRIB	-0.0915836	3.22756	-8.06748	4.03e-14	4.78e-13	21.3182
BDH2	-0.087785	2.76683	-8.06677	4.04e-14	4.8e-13	21.3138
SPTBN2	-0.195909	2.95784	-8.06676	4.04e-14	4.8e-13	21.3137
SAR1B	-0.0664196	3.0203	-8.06407	4.11e-14	4.88e-13	21.2969
PDIA4	0.0840781	3.20303	8.06397	4.12e-14	4.88e-13	21.2962
CXCL17	-0.319039	3.1605	-8.06242	4.16e-14	4.92e-13	21.2865
ADPGK	0.0762476	3.11414	8.06106	4.19e-14	4.96e-13	21.278
RUFY1	-0.046598	2.82012	-8.0601	4.22e-14	4.99e-13	21.2719
CD109	0.137425	3.03325	8.05546	4.35e-14	5.14e-13	21.2429
UNC13B	-0.151732	3.03889	-8.0537	4.39e-14	5.19e-13	21.2318
TMPRSS11E	-0.444299	3.233	-8.05245	4.43e-14	5.23e-13	21.224
TAGLN2	0.0676954	3.5676	8.0522	4.44e-14	5.24e-13	21.2224
ATG4A	-0.0728778	3.01471	-8.0495	4.51e-14	5.32e-13	21.2055
FAM107A	-0.176256	2.91015	-8.04919	4.52e-14	5.33e-13	21.2036
PDPK1	-0.053448	2.88907	-8.046	4.62e-14	5.44e-13	21.1836
PMP2	-0.121902	2.09182	-8.04493	4.65e-14	5.47e-13	21.1769
SLC25A4	-0.124968	2.70175	-8.04167	4.74e-14	5.58e-13	21.1565
NUDCD1	0.121738	2.77994	8.04088	4.77e-14	5.61e-13	21.1516
RBP1	0.169784	2.91857	8.04007	4.79e-14	5.63e-13	21.1465
SH2D2A	0.142255	2.87204	8.03818	4.85e-14	5.7e-13	21.1346
MKNK2	-0.100732	3.41665	-8.03705	4.89e-14	5.74e-13	21.1276
LRRC8E	0.216695	2.73032	8.03604	4.92e-14	5.77e-13	21.1213
CEP72	0.149635	2.53291	8.03488	4.95e-14	5.81e-13	21.114
MYH11	-0.120519	2.63617	-8.03267	5.02e-14	5.89e-13	21.1002
ZC3H12A	0.170309	3.13159	8.03245	5.03e-14	5.89e-13	21.0988
PCNX1	0.099979	2.61116	8.03163	5.06e-14	5.92e-13	21.0936
BLVRA	-0.0707121	2.9786	-8.03007	5.11e-14	5.98e-13	21.0839
SLC2A3	0.2044	2.89422	8.02992	5.11e-14	5.98e-13	21.0829
CPTP	-0.0751429	3.08615	-8.02851	5.16e-14	6.03e-13	21.0741
GABPB1	0.106315	2.91948	8.02585	5.25e-14	6.13e-13	21.0575
IL12RB2	0.316759	2.5208	8.0234	5.33e-14	6.22e-13	21.0421
AMOTL2	-0.117762	3.20551	-8.023	5.34e-14	6.23e-13	21.0397
MRPL14	0.0650326	3.3667	8.02065	5.42e-14	6.32e-13	21.025
CYP26B1	0.145643	2.70378	8.02062	5.42e-14	6.32e-13	21.0248
MCUB	0.120926	3.14974	8.01988	5.45e-14	6.35e-13	21.0201
SMOX	0.109193	2.66869	8.01887	5.48e-14	6.39e-13	21.0139
RIN2	0.0838304	3.0857	8.00692	5.92e-14	6.89e-13	20.9392
ATP5PD	-0.0375611	3.3067	-8.00642	5.94e-14	6.9e-13	20.936
IER5L	0.0949292	2.81697	8.00308	6.06e-14	7.05e-13	20.9152
PLAAT1	-0.30643	2.51534	-8.00173	6.12e-14	7.1e-13	20.9068
SEMA4D	-0.104653	2.80435	-8.0016	6.12e-14	7.11e-13	20.9059
SCD5	0.0950882	2.66257	7.99931	6.21e-14	7.21e-13	20.8917
ZNF875	-0.0707279	2.52915	-7.99855	6.24e-14	7.24e-13	20.8869
BBS2	-0.105543	2.98001	-7.99759	6.28e-14	7.28e-13	20.8809
CENPN	0.121127	2.7745	7.99575	6.35e-14	7.36e-13	20.8694
RUFY3	-0.0998043	2.9177	-7.99466	6.4e-14	7.4e-13	20.8626
PNPLA4	-0.111044	2.80562	-7.98721	6.71e-14	7.76e-13	20.8161
TMCC3	0.147672	2.99583	7.98509	6.8e-14	7.86e-13	20.8029
PSMB3	0.0506904	3.55955	7.98359	6.86e-14	7.93e-13	20.7936
MUC4	-0.306049	2.61595	-7.9823	6.92e-14	7.99e-13	20.7855
CFH	-0.21938	3.17888	-7.98187	6.94e-14	8.01e-13	20.7828
MS4A7	0.17835	3.06685	7.98094	6.98e-14	8.05e-13	20.7771
VAV3	-0.225868	3.01932	-7.97648	7.18e-14	8.28e-13	20.7492
SCAP	-0.0680555	3.12249	-7.97605	7.2e-14	8.29e-13	20.7466
TSPAN9	0.0750992	2.97451	7.97594	7.2e-14	8.3e-13	20.7459
TSPO	-0.0789682	3.50888	-7.97327	7.32e-14	8.43e-13	20.7293
PHTF1	0.11167	2.46472	7.9703	7.46e-14	8.59e-13	20.7107
DDX60L	0.139197	2.77027	7.96989	7.48e-14	8.61e-13	20.7082
COQ9	-0.070813	3.03781	-7.96845	7.55e-14	8.68e-13	20.6992
PTPN12	0.13055	2.87717	7.96604	7.67e-14	8.81e-13	20.6842
RDH5	-0.0803786	2.34968	-7.9604	7.95e-14	9.12e-13	20.6491
NOSTRIN	-0.232544	2.56397	-7.95987	7.97e-14	9.15e-13	20.6458
HACE1	-0.129341	2.84502	-7.95912	8.01e-14	9.19e-13	20.6411
MAPT	-0.0749503	2.47265	-7.95866	8.03e-14	9.21e-13	20.6383
HAPLN3	0.0946427	3.0313	7.9577	8.08e-14	9.26e-13	20.6323
ICA1L	-0.0522496	2.31048	-7.95701	8.12e-14	9.29e-13	20.628
RIPK2	0.096485	2.8917	7.95675	8.13e-14	9.3e-13	20.6264
HOXA10	0.158798	2.50381	7.95575	8.18e-14	9.36e-13	20.6201
SGSM3	-0.0600028	2.97021	-7.95443	8.25e-14	9.43e-13	20.6119
FN1	0.236458	3.24844	7.95344	8.3e-14	9.49e-13	20.6058
RPUSD3	-0.0416634	2.73899	-7.95209	8.38e-14	9.56e-13	20.5973
NAGS	0.150998	2.5993	7.95067	8.45e-14	9.64e-13	20.5885
MCM10	0.163704	2.62335	7.94295	8.87e-14	1.01e-12	20.5405
DHRS1	-0.156635	3.35139	-7.94257	8.9e-14	1.01e-12	20.5381
PRIM2	0.126019	2.32279	7.93714	9.21e-14	1.05e-12	20.5044
AUNIP	0.123174	2.66643	7.93672	9.23e-14	1.05e-12	20.5018
LCAT	0.0671449	2.58814	7.93596	9.27e-14	1.06e-12	20.4971
AGAP2-AS1	0.110032	2.89636	7.93496	9.33e-14	1.06e-12	20.4909
COX5B	-0.0556779	3.42741	-7.93325	9.43e-14	1.07e-12	20.4802
ZNF92	-0.0854998	2.4768	-7.93249	9.48e-14	1.08e-12	20.4755
PREP	0.0705308	2.92392	7.9315	9.54e-14	1.08e-12	20.4693
ABCA12	0.412064	2.76885	7.92903	9.69e-14	1.1e-12	20.454
SATB2	0.156998	2.41178	7.9269	9.82e-14	1.11e-12	20.4408
KPNA2	0.0744203	3.51189	7.92481	9.95e-14	1.13e-12	20.4278
RUNX1	0.0688661	2.74912	7.9236	1e-13	1.14e-12	20.4203
PWWP2B	-0.0593456	2.80177	-7.92208	1.01e-13	1.15e-12	20.4109
NDUFB11	-0.0571077	3.43554	-7.92203	1.01e-13	1.15e-12	20.4105
DCTN2	-0.0397398	2.83508	-7.92012	1.03e-13	1.16e-12	20.3987
BANF1	0.0823272	3.4656	7.91791	1.04e-13	1.17e-12	20.3849
MAB21L1	-0.246264	2.30351	-7.9177	1.04e-13	1.18e-12	20.3837
OARD1	-0.100121	2.95772	-7.91441	1.06e-13	1.2e-12	20.3632
SLC38A7	0.0711267	2.72378	7.91093	1.09e-13	1.23e-12	20.3416
C12orf43	0.0893847	2.75051	7.91088	1.09e-13	1.23e-12	20.3413
ZNF253	-0.112455	2.55577	-7.9106	1.09e-13	1.23e-12	20.3396
CORO1C	0.0773736	3.12405	7.91011	1.09e-13	1.23e-12	20.3366
SORBS1	-0.0977213	2.76989	-7.91008	1.09e-13	1.23e-12	20.3363
UBE2E1	-0.0479195	3.51289	-7.90962	1.1e-13	1.23e-12	20.3335
UAP1L1	0.132329	2.69338	7.90861	1.1e-13	1.24e-12	20.3272
PDE4B	0.219564	2.69065	7.90832	1.1e-13	1.24e-12	20.3255
RIC3	-0.082723	2.30263	-7.90743	1.11e-13	1.25e-12	20.3199
C1orf210	-0.133127	2.51591	-7.90625	1.12e-13	1.26e-12	20.3126
PARD3	-0.117134	2.96025	-7.90335	1.14e-13	1.28e-12	20.2946
WARS	0.187221	3.36297	7.90214	1.15e-13	1.29e-12	20.2871
SCRN1	0.132193	3.20204	7.89983	1.16e-13	1.31e-12	20.2728
DNAJB11	0.072318	3.36689	7.8973	1.18e-13	1.33e-12	20.2571
NF1	0.0709778	2.62073	7.89518	1.2e-13	1.34e-12	20.244
TECPR1	-0.0816279	2.91105	-7.89269	1.22e-13	1.36e-12	20.2285
STRIP2	0.255104	2.42868	7.89133	1.23e-13	1.37e-12	20.2201
PPP1CB	-0.056081	3.47966	-7.89051	1.24e-13	1.38e-12	20.2151
NOL12	-0.0673035	2.83139	-7.89025	1.24e-13	1.38e-12	20.2135
NEK6	0.0797919	2.63808	7.88884	1.25e-13	1.39e-12	20.2047
EDIL3	0.191476	2.64756	7.88863	1.25e-13	1.4e-12	20.2034
ANO1	0.286353	2.99305	7.88795	1.26e-13	1.4e-12	20.1992
GAS2	-0.124257	2.08684	-7.8876	1.26e-13	1.4e-12	20.197
MAP4K3-DT	-0.0790324	2.18666	-7.88557	1.27e-13	1.42e-12	20.1845
CDH26	-0.165629	2.40851	-7.88512	1.28e-13	1.42e-12	20.1817
CAPNS2	-0.275327	3.28256	-7.88383	1.29e-13	1.43e-12	20.1737
KIAA0040	0.111702	2.78145	7.88166	1.31e-13	1.45e-12	20.1602
FERMT1	0.133652	3.05789	7.88038	1.32e-13	1.46e-12	20.1523
PLS1	-0.305262	2.89978	-7.87553	1.36e-13	1.51e-12	20.1223
UFSP2	-0.0661774	3.11396	-7.8732	1.38e-13	1.53e-12	20.1079
ITGB6	0.305608	2.93163	7.87283	1.38e-13	1.53e-12	20.1056
NIPAL1	-0.2137	2.83013	-7.86791	1.42e-13	1.58e-12	20.0751
STMP1	-0.13417	2.73341	-7.86714	1.43e-13	1.59e-12	20.0704
THAP4	-0.0705827	3.11	-7.8643	1.46e-13	1.61e-12	20.0528
ARRB1	-0.0714	2.75166	-7.86221	1.48e-13	1.64e-12	20.0399
CREM	0.0966707	2.75026	7.86043	1.49e-13	1.65e-12	20.0289
P3H2	0.175169	2.93556	7.86001	1.5e-13	1.66e-12	20.0263
CYP2R1	-0.107818	2.62905	-7.85651	1.53e-13	1.69e-12	20.0047
PLBD2	0.0717677	2.88929	7.85517	1.54e-13	1.71e-12	19.9964
RAB5A	-0.0714674	3.03232	-7.85501	1.54e-13	1.71e-12	19.9954
GPR39	0.143637	2.54899	7.85434	1.55e-13	1.71e-12	19.9913
PAPOLG	0.057158	2.68103	7.85289	1.57e-13	1.73e-12	19.9823
RHOT1	-0.0660937	2.96628	-7.8526	1.57e-13	1.73e-12	19.9805
PI15	0.232443	2.60724	7.84671	1.63e-13	1.79e-12	19.9442
SLC66A1	0.057906	2.70368	7.84529	1.64e-13	1.81e-12	19.9354
EPHA1	-0.0861995	2.7614	-7.84505	1.64e-13	1.81e-12	19.9339
C15orf48	-0.227811	3.39101	-7.84306	1.67e-13	1.83e-12	19.9216
SSR3	0.0801979	3.06607	7.84149	1.68e-13	1.85e-12	19.9119
MIR31HG	0.259092	2.80949	7.83998	1.7e-13	1.87e-12	19.9026
MASP2	-0.0411064	2.61077	-7.83964	1.7e-13	1.87e-12	19.9005
RGS4	0.260535	2.69076	7.8396	1.7e-13	1.87e-12	19.9003
AKR1B1	0.117329	3.34055	7.83701	1.73e-13	1.9e-12	19.8843
BLOC1S3	0.0607014	2.77949	7.83653	1.73e-13	1.9e-12	19.8813
EXD2	-0.0647005	2.82483	-7.83516	1.75e-13	1.92e-12	19.8729
HIF3A	-0.0608616	2.40126	-7.83237	1.78e-13	1.95e-12	19.8556
MPZL3	-0.147507	2.61853	-7.83094	1.8e-13	1.97e-12	19.8468
NDUFS3	-0.0533579	3.33763	-7.82962	1.81e-13	1.98e-12	19.8387
ERCC5	-0.0800999	3.09738	-7.82561	1.86e-13	2.03e-12	19.8139
COX7B	-0.0744262	3.18025	-7.8239	1.88e-13	2.05e-12	19.8034
TXN	-0.0929312	3.44807	-7.81963	1.93e-13	2.11e-12	19.7771
RCAN1	0.119401	2.89424	7.81897	1.94e-13	2.12e-12	19.773
CXCR4	0.272969	3.22591	7.81575	1.98e-13	2.16e-12	19.7532
TACSTD2	-0.0570462	2.9853	-7.8149	1.99e-13	2.17e-12	19.7479
RUNX1-IT1	0.231362	2.86491	7.81437	1.99e-13	2.17e-12	19.7447
RHOB	0.10331	2.6781	7.81168	2.03e-13	2.21e-12	19.7281
PAX1	-0.263192	2.44944	-7.81151	2.03e-13	2.21e-12	19.7271
SESN3	0.161058	2.53335	7.80786	2.08e-13	2.26e-12	19.7046
PSMG2	-0.0418764	3.02272	-7.80568	2.1e-13	2.29e-12	19.6912
TIMP1	0.145837	3.52024	7.8054	2.11e-13	2.29e-12	19.6894
GPRC5B	-0.103842	2.64043	-7.80113	2.17e-13	2.35e-12	19.6632
PCGF1	0.0684581	3.08958	7.80022	2.18e-13	2.37e-12	19.6575
NAALAD2	-0.0381604	2.00616	-7.79924	2.19e-13	2.38e-12	19.6515
CXCL6	0.483957	2.68966	7.79798	2.21e-13	2.4e-12	19.6438
ARSD	-0.0931304	2.79687	-7.79641	2.23e-13	2.42e-12	19.6341
PNPT1	0.0959141	3.26271	7.79484	2.25e-13	2.44e-12	19.6244
RAI2	-0.175283	2.80701	-7.79122	2.3e-13	2.5e-12	19.6022
KCTD18	-0.0588832	2.93502	-7.78739	2.36e-13	2.56e-12	19.5786
RHOA	-0.038321	3.26853	-7.7848	2.4e-13	2.6e-12	19.5627
SOAT1	0.150861	2.8528	7.7838	2.41e-13	2.61e-12	19.5566
PITPNA	-0.0701819	3.24377	-7.78357	2.42e-13	2.61e-12	19.5551
C11orf52	-0.175678	2.55671	-7.78264	2.43e-13	2.63e-12	19.5494
EXTL3	0.082844	2.83969	7.78151	2.45e-13	2.65e-12	19.5425
CMIP	0.0670936	2.9925	7.78096	2.46e-13	2.65e-12	19.5391
PRELID3A	0.100556	2.50189	7.78074	2.46e-13	2.66e-12	19.5378
NMRK1	-0.109052	2.87549	-7.77908	2.49e-13	2.68e-12	19.5276
CITED2	-0.125646	2.96482	-7.77849	2.5e-13	2.69e-12	19.5239
SEC61A1	0.0616303	3.3316	7.77654	2.53e-13	2.72e-12	19.512
MELK	0.149638	3.1872	7.77643	2.53e-13	2.72e-12	19.5113
GLB1	0.0775048	3.20312	7.77622	2.53e-13	2.72e-12	19.51
C12orf29	-0.110099	3.1692	-7.77577	2.54e-13	2.73e-12	19.5072
SLC35B2	0.0842275	3.12027	7.77174	2.6e-13	2.8e-12	19.4825
LPAR5	-0.124788	2.85117	-7.76552	2.71e-13	2.91e-12	19.4443
ADGRG6	-0.157955	2.54364	-7.76508	2.71e-13	2.91e-12	19.4416
PLCXD3	-0.0648265	2.11443	-7.7647	2.72e-13	2.92e-12	19.4393
NDUFB7	-0.0542256	2.86948	-7.76	2.8e-13	3e-12	19.4104
C1QC	0.168849	3.33356	7.75922	2.81e-13	3.02e-12	19.4057
ARHGEF26-AS1	-0.0686123	2.0367	-7.75791	2.84e-13	3.04e-12	19.3976
TSPYL1	-0.053977	2.71316	-7.75664	2.86e-13	3.06e-12	19.3898
AGR2	-0.399009	2.86138	-7.75232	2.94e-13	3.15e-12	19.3633
SNX5	0.0648166	3.04801	7.75152	2.95e-13	3.16e-12	19.3584
BYSL	0.0976344	3.04848	7.74863	3.01e-13	3.22e-12	19.3407
CCT6B	-0.114242	2.42019	-7.74565	3.06e-13	3.27e-12	19.3224
HEXIM1	-0.0603185	3.10873	-7.74421	3.09e-13	3.3e-12	19.3136
FDX1	-0.0626207	2.97173	-7.74287	3.12e-13	3.33e-12	19.3054
SDC3	0.0843056	2.62781	7.74251	3.12e-13	3.33e-12	19.3032
AGR3	-0.520451	2.313	-7.74197	3.13e-13	3.34e-12	19.2999
TMX1	0.0876586	3.35063	7.74141	3.14e-13	3.35e-12	19.2965
STARD3NL	0.136195	3.16834	7.7373	3.23e-13	3.44e-12	19.2713
PLEC	0.128897	3.18875	7.73292	3.32e-13	3.53e-12	19.2445
EPM2AIP1	-0.0916337	2.98212	-7.7329	3.32e-13	3.53e-12	19.2443
RNF149	0.0614014	3.44501	7.72948	3.39e-13	3.6e-12	19.2234
LCOR	-0.0578117	2.77806	-7.72944	3.39e-13	3.6e-12	19.2231
TUBG2	0.102077	2.52549	7.72926	3.39e-13	3.61e-12	19.222
CHEK1	0.13349	2.69143	7.72881	3.4e-13	3.61e-12	19.2193
FKBP9	0.0993485	3.31023	7.72766	3.43e-13	3.64e-12	19.2122
PRDM6	-0.111958	2.52508	-7.72402	3.5e-13	3.72e-12	19.19
PARD6B	-0.114638	2.38609	-7.72322	3.52e-13	3.74e-12	19.185
SULT2B1	-0.268298	3.10292	-7.7201	3.59e-13	3.81e-12	19.166
ABCB1	-0.109778	2.23445	-7.71723	3.66e-13	3.87e-12	19.1484
IDH1	-0.0700014	3.16564	-7.71483	3.71e-13	3.93e-12	19.1338
CTSB	0.0836691	3.50287	7.7146	3.72e-13	3.93e-12	19.1323
RCN1	0.114238	3.28045	7.71409	3.73e-13	3.94e-12	19.1292
SLC25A22	0.0792594	2.89788	7.71305	3.75e-13	3.97e-12	19.1229
EXT1	0.135686	3.00759	7.71294	3.75e-13	3.97e-12	19.1222
ALG3	0.0699278	3.19721	7.70834	3.86e-13	4.08e-12	19.0941
NUAK2	-0.140986	3.12897	-7.702	4.02e-13	4.24e-12	19.0553
ERMP1	-0.161952	3.12484	-7.70173	4.03e-13	4.25e-12	19.0537
AFAP1L2	0.195264	2.80416	7.7011	4.04e-13	4.26e-12	19.0498
MRPL35	-0.0594493	2.92158	-7.69779	4.13e-13	4.35e-12	19.0296
IDO1	0.321117	2.99839	7.69764	4.13e-13	4.35e-12	19.0287
AKAP9	-0.0678409	2.82783	-7.69537	4.19e-13	4.41e-12	19.0149
YY1AP1	-0.0521708	3.36145	-7.69508	4.2e-13	4.42e-12	19.0131
RPS28	-0.0420687	3.26082	-7.69224	4.27e-13	4.49e-12	18.9957
HSF1	0.0652531	2.71787	7.69154	4.29e-13	4.51e-12	18.9915
IL32	0.172923	3.26641	7.68819	4.38e-13	4.6e-12	18.971
PMEL	-0.116336	2.82468	-7.68763	4.39e-13	4.62e-12	18.9676
IL1B	0.267053	3.1689	7.68726	4.4e-13	4.62e-12	18.9653
ARSB	0.0663807	2.26701	7.68644	4.43e-13	4.65e-12	18.9604
ARSG	-0.093053	2.45185	-7.68637	4.43e-13	4.65e-12	18.9599
NUAK1	0.187484	3.08998	7.68458	4.48e-13	4.69e-12	18.949
FAM149B1	-0.0618735	2.58087	-7.68104	4.58e-13	4.8e-12	18.9274
NXN	0.0844565	3.47831	7.67868	4.65e-13	4.87e-12	18.913
MYLK3	-0.10483	2.20876	-7.67625	4.72e-13	4.94e-12	18.8982
FHOD1	0.106313	2.98308	7.67593	4.73e-13	4.94e-12	18.8962
ABHD12	-0.0877727	3.12506	-7.67285	4.82e-13	5.04e-12	18.8775
CLIP2	0.132252	2.77742	7.67177	4.85e-13	5.07e-12	18.8709
HECTD1	-0.103009	2.91057	-7.67062	4.88e-13	5.1e-12	18.8639
PIAS1	-0.0708122	2.94918	-7.6703	4.89e-13	5.11e-12	18.862
SF3B5	-0.044177	3.45378	-7.66344	5.11e-13	5.33e-12	18.8201
ZCCHC8	-0.0585608	2.97547	-7.66242	5.14e-13	5.36e-12	18.814
TSPAN8	-0.48652	2.50847	-7.65948	5.23e-13	5.46e-12	18.796
SUGCT	0.203405	2.86692	7.65724	5.31e-13	5.53e-12	18.7824
RAD51D	-0.0625728	2.65839	-7.65664	5.33e-13	5.55e-12	18.7787
CKAP5	0.0723621	3.15837	7.65636	5.33e-13	5.55e-12	18.777
FBRS	-0.0608851	2.85987	-7.65609	5.34e-13	5.56e-12	18.7754
GTF3C1	-0.0699801	3.18603	-7.65606	5.34e-13	5.56e-12	18.7752
SCGB2A2	-0.411835	2.10677	-7.65509	5.38e-13	5.59e-12	18.7693
IGSF6	0.185559	2.43242	7.65112	5.51e-13	5.72e-12	18.7451
TIGAR	0.118914	3.13063	7.64971	5.56e-13	5.77e-12	18.7365
RPN2	0.0573277	3.56521	7.64958	5.56e-13	5.77e-12	18.7358
SERPINA1	0.166503	2.7199	7.64934	5.57e-13	5.78e-12	18.7343
DISP1	-0.127219	2.59888	-7.64728	5.64e-13	5.85e-12	18.7218
BAG1	-0.115813	3.11782	-7.64529	5.71e-13	5.92e-12	18.7097
CMSS1	0.102907	3.13106	7.64465	5.74e-13	5.94e-12	18.7058
PCOTH	-0.122831	2.48143	-7.64399	5.76e-13	5.96e-12	18.7018
ZNF395	-0.115087	2.99647	-7.64344	5.78e-13	5.98e-12	18.6984
LRFN4	0.0570009	2.87661	7.64075	5.88e-13	6.08e-12	18.6821
RPP14	-0.0596451	2.82095	-7.64014	5.9e-13	6.1e-12	18.6784
RNPEPL1	-0.0674132	2.88961	-7.634	6.13e-13	6.33e-12	18.641
GZMB	0.278459	3.02009	7.63398	6.13e-13	6.33e-12	18.6409
MICU2	-0.0642838	3.3169	-7.63335	6.15e-13	6.35e-12	18.6371
REEP3	0.131293	2.97028	7.6312	6.23e-13	6.43e-12	18.624
DDIT4	0.145302	3.46775	7.63085	6.25e-13	6.44e-12	18.6219
COMTD1	-0.0900155	3.06074	-7.63027	6.27e-13	6.46e-12	18.6184
HEMK1	-0.0495437	2.74494	-7.62915	6.31e-13	6.5e-12	18.6116
NR2F1	-0.179524	2.76473	-7.62833	6.35e-13	6.53e-12	18.6066
MVP	0.0774205	3.27251	7.62497	6.48e-13	6.67e-12	18.5861
TOM1L2	-0.073251	2.90919	-7.62443	6.5e-13	6.69e-12	18.5829
[truncated: 18,551 more rows]
